# Cytokines, chemokines and growth factors in endometrium related to implantation

E.Dimitriadis<sup>1</sup>, C.A.White, R.L.Jones and L.A.Salamonsen

Prince Henry's Institute of Medical Research, P.O. Box 5152, Clayton, Victoria 3168, Australia

<sup>1</sup>To whom correspondence should be addressed at: Prince Henry's Institute of Medical Research, PO Box 5152, Clayton, Victoria 3168, Australia. E-mail: evdokia.dimitriadis@phimr.monash.edu.au

**The complexity of the events of embryo implantation and placentation is exemplified by the number and range of cytokines with demonstrated roles in these processes. Disturbance of the normal expression or action of these cytokines results in complete or partial failure of implantation and abnormal placental formation in mice or humans. Of known importance are members of the gp130 family such as interleukin-11 (IL-11) and leukaemia inhibitory factor (LIF), the transforming growth factor  $\beta$  (TGF $\beta$ ) superfamily including the activins, the colony-stimulating factors (CSF), the IL-1 system and IL-15 system. New data are also emerging for roles for a number of chemokines (chemoattractive cytokines) both in recruiting specific cohorts of leukocytes to implantation sites and in trophoblast differentiation and trafficking. This review focuses on those cytokines and chemokines whose expression pattern in the human endometrium is consistent with a potential role in implantation and placentation and for which some relevant actions are known. It examines what is known of their regulation and action along with alterations in clinically relevant situations.**

*Key words:* chemokines/cytokines/endometrium/implantation/placentation

## Introduction

Development of the embryo to the blastocyst stage, its implantation into the uterine endometrium and the formation of a functional placenta are essential steps in the establishment of pregnancy. Each requires interaction between the conceptus (particularly the trophoblast) and one or more of the cell types within the maternal endometrium. The success of implantation ultimately depends on achieving the appropriate extent of trophoblast outgrowth and finely orchestrating its invasion into the endometrium to establish a blood supply for the conceptus. There are marked differences in implantation between species, and these are, in part, related to the differences in the forms of placentation (Wooding and Flint, 1994). Humans are unusual in the aggressiveness of the trophoblast, as evidenced by the occurrence of ectopic pregnancy only in women, and that certain molecular changes in the luminal epithelium occur only directly where embryo contact first occurs, rather than across the entire endometrial surface (Meseguer *et al.*, 2001). Furthermore, in humans, initiation of the process of decidualization [differentiation of endometrial stromal fibroblasts and the accompanying influx of uterine-specific natural killer (uNK) cells to form the decidua of pregnancy] occurs spontaneously in the latter part of each menstrual cycle, by comparison with most other species with haemochorial placentation (including rats and mice) in which this process occurs naturally only in the presence of a blastocyst.

Cytokines are small multifunctional glycoprotein mediators whose biological actions are mediated locally by specific receptors

and which are linked to most processes in the body, including implantation and immune function. Both pleiotrophy and redundancy exist within the cytokine families, and several different cytokines often exert similar and overlapping functions on certain cells. Their receptors also often display redundancy and utilize different signal transduction pathways (Robertson, 1998). A wide array of cytokines are expressed within the uterus of a range of species. Their cellular source varies and includes somatic cells, particularly endometrial stromal, epithelial or decidual cells and trophoblast cells, but also the subsets of leukocytes (particularly macrophages and uNK cells) that are present at this time, especially in the human. Variation of expression with the menstrual or oestrous cycle suggests regulation at least in part by steroid hormones, although regulation by local factors originating from other cells within the endometrium or by conceptus-derived factors or semen is also apparent.

This review will focus on cytokines thought to be important for the early stages of embryo implantation, with particular focus on the human. Because it is not possible to perform *in vivo* functional studies in women, most of our current knowledge on the functional roles of these mediators at implantation comes from studies of gene manipulation in mice. Perhaps not surprisingly, given the importance of the process of implantation to the continuity of a species and the remarkable flexibility and redundancy of the cytokine network, there is a lack of 'implantation-failure' phenotype in most mice lacking individual cytokines or their receptors (Table I), although inadequacies in placental development are

**Table 1.** Cytokine or cytokine-receptor knockout studies: effects on implantation

| Gene                       | Female reproductive phenotype                                            | Reference                                                    |
|----------------------------|--------------------------------------------------------------------------|--------------------------------------------------------------|
| CSF-1                      | Increased foetal resorption                                              | Pollard <i>et al.</i> (1991)                                 |
| GM-CSF                     | Implantation rates normal, mean litter sizes small, placental deficiency | Robertson <i>et al.</i> (1999)                               |
| IL-1Rt1                    | Implantation normal, minor effect on litter size                         | Abbondanzo <i>et al.</i> (1996)                              |
| IL-6                       | Reduced fertility; viable implantation sites decreased 48%               | Robertson <i>et al.</i> (2000)                               |
| IL-11R $\alpha$            | Failure of implantation, defective decidualization                       | Bilinski <i>et al.</i> (1998); Robb <i>et al.</i> (1998)     |
| gp130 <sup>a</sup>         | Intrauterine lethality, placental deficiency                             | Yoshida <i>et al.</i> (1996)                                 |
| LIF                        | Failure of implantation                                                  | Stewart <i>et al.</i> (1992)                                 |
| LIFR <sup>a</sup>          | Intrauterine lethality                                                   | Ware <i>et al.</i> (1995)                                    |
| SOCS3                      | Placental defects and embryonic lethality                                | Roberts <i>et al.</i> (2001); Takahashi <i>et al.</i> (2003) |
| Bmpr1B                     | Infertile/failure in endometrial gland formation                         | Yi <i>et al.</i> (2001)                                      |
| TGF $\beta$ 1 <sup>a</sup> | Intrauterine lethality and early postnatal lethality                     | Schull <i>et al.</i> (1992); Kulkarni and Karlsson (1993)    |

Modified from Salamonsen *et al.* (2000) Cytokines in implantation. *Sem Reprod Med* 18,299–310. Reprinted with permission.

<sup>a</sup>In each of these mouse strains, the effect of the absence of cytokine signalling could not be assessed because of intrauterine lethality of the null embryos.

often seen. Such placental abnormalities in women can lead to pre-eclampsia, low birthweight babies and long-term health consequences for the infant. In women, analysis of the temporal and cellular expression patterns of the cytokines and their receptors in the endometrium, and application of a limited number of *in vitro* models, have indicated but not proven that cytokines are key regulators of human implantation.

### The gp130 cytokines

Some of the redundancy and pleiotrophy between certain cytokines is evidenced at a molecular level by the gp130 cytokines, which share an accessory signal transducing subunit. These cytokines include leukaemia inhibitory factor (LIF), interleukin-6 (IL-6), IL-11, cardiotrophin (CT) 1, ciliary neurotrophic factor (CNTF), oncostatin M (OSM) and cardiotropin-like cytokine/cytokine-like factor (CLC–CLF). A number of these (LIF, OSM, CT-1 and CNTF) bind to the LIF receptor  $\alpha$  chain, whereas IL-11, IL-6, OSM and CT-1 also have specific low affinity  $\alpha$  receptor subunits. Binding of each cytokine to its receptor  $\alpha$  triggers dimerization with gp130, forming a high affinity receptor leading to activation of the janus kinase/signal transducer and activator of transcription (JAK/STAT) signal transduction pathway (Heinrich *et al.*, 1998). Both membrane bound and soluble forms of the receptor components have been identified, and they may act as inhibitors of cytokine action by competing with cell surface

receptors to limit dimerization with gp130 (Heaney and Golde, 1996). Signal transduction from cytokines acting through the JAK/STAT pathway is attenuated via the suppressors of cytokine signalling (SOCS) family of cytoplasmic proteins that complete a negative feedback loop (Alexander, 2002). Of the cytokines that utilize gp130 for signalling, LIF, IL-6 and IL-11 have been implicated in the implantation process.

### LIF

LIF was originally identified by its ability to induce the macrophage differentiation of the myeloid leukaemia cell line M1 (Tomida *et al.*, 1984; Hilton *et al.*, 1988a,b). It has a variety of roles including proliferation, differentiation and cell survival, all functions that are essential for blastocyst development and implantation (Hilton, 1992; Metcalf, 1992). LIF was the first cytokine shown to be critical for implantation in mice (Stewart *et al.*, 1992). LIFs pattern of expression in the human endometrium also suggests a role in implantation. In endometrium of women of proven fertility, LIF mRNA is expressed during days 18–28 of the menstrual cycle (Charnock-Jones *et al.*, 1994; Kojima *et al.*, 1994; Arici *et al.*, 1995; Sharkey *et al.*, 1995; Vogiatzis *et al.*, 1996; Dimitriadis *et al.*, 2000). Both LIF mRNA and protein are localized in uterine glandular and luminal epithelium (Sharkey *et al.*, 1995; Vogiatzis *et al.*, 1996), whereas immunoreactive LIF has also been observed in stroma (Baird *et al.*, 1996; Vogiatzis *et al.*, 1996; Gemzell-Danielsson and Swahn, 1997; Aghajanova *et al.*, 2003). LIF-receptor (LIF-R) mRNA is restricted to luminal and probably also glandular epithelium in the mid-secretory phase (Cullinan *et al.*, 1996; Aghajanova *et al.*, 2003).

During pregnancy, LIF and LIF-R genes have been detected in the decidua and chorionic villi of first trimester and term placenta in humans (Kojima *et al.*, 1994, 1995; Sawai *et al.*, 1995a, 1997; Sharkey *et al.*, 1999). LIF-R mRNA and immunoreactivity localize in both villous and extravillous trophoblast throughout pregnancy and in endothelial cells of the foetal villi (Sharkey *et al.*, 1999). Strong expression of mRNA encoding LIF has also been detected in decidual leukocytes, which are abundant at the implantation site, suggesting that LIF may mediate interactions between maternal decidual leukocytes and invading trophoblast cells (Sharkey *et al.*, 1999).

Progesterone is a likely major regulator of LIF expression. Not only does endometrial LIF expression coincide with progesterone domination of the tissue, but treatment of women with the progesterone receptor antagonist, mifepristone (RU486) immediately after ovulation, reduces immunoreactive LIF at the expected time of implantation (Gemzell-Danielsson and Swahn, 1997). However, locally produced factors, including heparin-bound epidermal growth factor (HB-EGF) and transforming growth factor  $\beta$ 1 (TGF $\beta$ 1), have been shown to regulate LIF secretion by cultured endometrial cells (Arici *et al.*, 1995; Lessey *et al.*, 2002) and may also be relevant *in vivo*.

The biological actions of endometrial LIF are not yet understood although the glandular expression indicates likely secretion into the uterine lumen. LIF protein is maximal in uterine flushings in the mid-late secretory phase of the menstrual cycle at the time of expected implantation in fertile women, suggesting a role in uterine receptivity (Laird *et al.*, 1997; Ledee-Bataille *et al.*, 2002). Should LIF be released basally from uterine epithelium, paracrine

effects on the underlying stroma and leukocytes would be possible. A recent study in mice suggests an involvement of LIF in the migration of uNK cells in early pregnancy (Schofield and Kimber, 2005), while *in vitro*, a role for LIF in regulating human endometrial stromal cell survival but not decidualization has been demonstrated (Nakajima *et al.*, 2003). Furthermore, LIF appears to stimulate the expression of progesterone-regulated genes in the luminal epithelium in mice (Sherwin *et al.*, 2004).

LIF may also act on the embryo, as blastocysts produced by *in vitro* fertilization and cultured to the periimplantation stage express LIF-R transcripts (Charnock-Jones *et al.*, 1994). A role for LIF in trophoblast cell growth and differentiation has also been shown (Kojima *et al.*, 1995; Sawai *et al.*, 1995b; Nachtigall *et al.*, 1996; Ren *et al.*, 1997). Thus in humans, LIF may signal to both embryonic and uterine tissues during implantation.

Evidence suggests that LIF is important for human fertility (Laird *et al.*, 1997; Ledee-Bataille *et al.*, 2002). LIF is reduced in endometrial flushings from women with unexplained fertility compared with normal fertile women, whereas endometrial explants from infertile women secrete less LIF than those from fertile women (Laird *et al.*, 1997; Ledee-Bataille *et al.*, 2002). However, the substantial effects of culture on cytokine production from explants were not taken into account in this study. Interestingly, another report revealed that LIF mRNA levels did not differ between fertile and infertile women (Sherwin *et al.*, 2002), although lower immunostaining has been demonstrated in endometrium of women who were infertile compared with fertile women (Tsai *et al.*, 2000) and in a cohort of women with infertility and endometriosis (Stoikos *et al.*, 2003). Furthermore, LIF and LIF-R immunostaining are maximal in both luminal and glandular epithelium between days LH + 6 and LH + 9 coinciding with pinopode formation (Aghajanova *et al.*, 2003). A role for LIF in recurrent miscarriage has also been postulated. Decreased production of LIF by decidual T cells from women with unexplained recurrent abortions compared with women with normal gestation may contribute to the development of unexplained recurrent abortions (Piccinni *et al.*, 1998). However, in another study examining early abortion, no difference in LIF or LIF-R expression in first-trimester decidua or chorionic villi between women with anembryonic pregnancies and normal pregnancies was found (Chen *et al.*, 2004).

## IL-11

IL-11 was initially described as a growth factor acting on multiple stages during hematopoiesis, synergizing with other factors (Du and Williams, 1994). More recently, it has been demonstrated to have important anti-inflammatory activities (Sands *et al.*, 1999) as well as pleiotropic actions in multiple cell types (Du and Williams, 1994). Mice lacking the receptor for IL-11 have a fertility defect, which, unlike that in the LIF-deficient mice, occurs in the post-implantation response to the implanting blastocyst (Robb *et al.*, 1998). A recent study has identified genes regulated by IL-11 in the uterus during pseudopregnancy in mice (White *et al.*, 2004).

There is increasing evidence that IL-11 has an important function in implantation in humans. IL-11 is expressed in endometrial glandular and luminal epithelium although there is conflicting data regarding the time of maximal epithelial production, possibly because of differing protocols for immunohistochemistry (Dimitriadis *et al.*,

2000; Cork *et al.*, 2001; von Rango *et al.*, 2004). Importantly, IL-11R $\alpha$  and gp130 are expressed in both luminal and glandular epithelium (Cullinan *et al.*, 1996; Cork *et al.*, 2002; von Rango *et al.*, 2004). However, it appears that there is no cyclical variation in IL-11R $\alpha$  expression, and thus the expression pattern of ligand may be critical for IL-11 function in the endometrium. It remains to be evaluated whether epithelial-derived IL-11 is secreted apically into the uterine lumen or basally into the stroma or whether human preimplantation embryos express IL-11 or IL-11R $\alpha$ .

Several studies have identified both IL-11 and IL-11R $\alpha$  mRNA and protein in decidual cells from late secretory phase and early pregnant endometrium (Chen *et al.*, 2002; Cork *et al.*, 2002; Dimitriadis *et al.*, 2002, 2003; Karpovich *et al.*, 2003). Furthermore, invasive trophoblast cells are a source of IL-11 and IL-11R $\alpha$  during early pregnancy in primates, suggesting an involvement in placentation (Chen *et al.*, 2002; Dimitriadis *et al.*, 2003).

IL-11 is involved in decidualization and advances *in vitro* progesterone-induced decidualization of human endometrial stromal cells (Dimitriadis *et al.*, 2002). Furthermore, up-regulation of IL-11 mRNA was detected by gene array during progesterone or cAMP-induced *in vitro* decidualization of endometrial stromal cells (Popovici *et al.*, 2000; Tierney *et al.*, 2003). IL-11 and IL-11R $\alpha$  immunolocalize to decidualized stromal cells of mid-late secretory phase endometrium in the human, demonstrating a local source for action (Cork *et al.*, 2002; Dimitriadis *et al.*, 2002). IL-11 secretion and mRNA expression by human endometrial stromal cells are stimulated by locally produced factors, relaxin and prostaglandin estradiol (E<sub>2</sub>), acting at least in part via cAMP during human endometrial stromal cell decidualization (Figure 1), although progesterone attenuates IL-11 secretion and mRNA expression (Dimitriadis *et al.*, 2005). In agreement, in cultured human endometrial and first-trimester decidua-derived epithelial cells, IL-11 secretion is reduced by co-culture with estrogen and progesterone but stimulated by estrogen alone (von Rango *et al.*, 2004). Thus, both local factors and steroid hormones regulate IL-11 mRNA expression and secretion in the human endometrium.

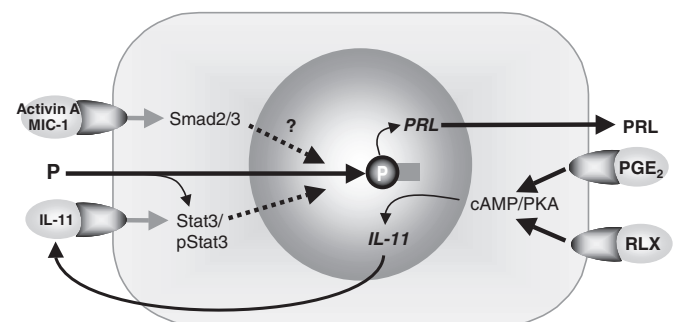

**Figure 1.** The figure shows as an example, the potential complex interrelationships between progesterone, prostaglandin (PG) estradiol (E<sub>2</sub>), relaxin (RLX), interleukin-11 (IL-11), activin A and macrophage inhibitory protein-1 (MIC-1) in stimulating decidualization of human endometrial stromal cells. Prolactin is a marker of decidualization. Progesterone is necessary for decidualization, and its effects can be enhanced *in vitro* by PG E<sub>2</sub> or relaxin, both of which act via cAMP (exogenous cAMP can also drive the process *in vitro*). Effects of both relaxin and PG E<sub>2</sub> are via stimulation of IL-11 production. Progesterone attenuates IL-11 expression. IL-11 enhances P-induced decidualization via phosphorylation of signal transducer and activator of transcription (STAT3). Both Activin A and MIC-1 also stimulate decidualization via activation of Smads. ● ligand; ◻ receptor.

Interestingly, recent evidence in mice shows that IL-11 signalling is required for decidual-specific maturation of NK cells in mice (Ain *et al.*, 2004). As yet, there are no studies examining the role of IL-11 in NK cell function during human implantation.

Emerging evidence indicates that IL-11 is important in the establishment of viable pregnancies. Immunoreactive IL-11 is reduced in the glands in ectopic non-viable tubal pregnancies compared with vital ectopic tubal and normal intrauterine pregnancies, indicating that inadequate IL-11 signalling may result in dysregulation of trophoblast invasion (von Rango *et al.*, 2004). Furthermore, in contrast to LIF, IL-11 mRNA expression and immunostaining is reduced in decidua and trophoblast in women with anembryonic pregnancies that result in early abortion, compared with normal pregnancies. IL-11 and IL-11R $\alpha$  are also reduced in endometrium in cohorts of women with infertility and endometriosis compared with fertile women during the window of implantation (Stoikos *et al.*, 2003). Studies are now required to determine the functional significance of these findings.

### IL-6

IL-6 is a multifunctional cytokine that regulates various aspects of the immune response, acute phase reaction and hematopoiesis and has some functional redundancy with IL-11 and LIF. IL-6-deficient mice have reduced fertility and a decrease in viable implantation sites (Robertson *et al.*, 2000). In humans, IL-6 is weakly expressed during the proliferative phase, but strong immunoreactivity is present during the mid-secretory phase, predominantly in the glandular and luminal epithelial cells (Tabibzadeh *et al.*, 1995; Vandermolen and Gu, 1996). Furthermore, IL-6-R is localized in glandular epithelium throughout the menstrual cycle (Tabibzadeh *et al.*, 1995). Therefore, a role in the human implantation could also be postulated for this cytokine.

Serum IL-6 has been shown to be augmented in patients with recurrent abortions (Margni and Zenclussen, 2001; Zenclussen *et al.*, 2003), although levels in the uterus were not measured. Importantly, when levels of IL-6 secretion were measured from endometrial biopsies isolated from infertile women compared with fertile women between days LH + 6 and LH + 13, no difference was found (Sherwin *et al.*, 2002), and it is therefore likely that IL-6 has a redundant role in uterine receptivity. It has also been suggested that IL-6 may contribute to trophoblast growth and placental development in humans (Nishino *et al.*, 1990).

### Gp130 and gp130 family-soluble receptors

Gp130 deficiency in mice leads to embryonic lethality (Yoshida *et al.*, 1996). Both membrane bound and soluble forms of gp130 have been identified, and the latter can act as an inhibitor of cytokine action by competing with membrane-bound receptor for ligand binding (Heaney and Golde, 1996; Heinrich *et al.*, 1998). Gp130 mRNA localizes predominantly to glandular and luminal epithelium in human endometrium (Cullinan *et al.*, 1996) and has also been demonstrated in human embryos from the three cell to blastocyst stage (Sharkey *et al.*, 1995; van Eijk *et al.*, 1996).

Naturally occurring soluble receptors for IL-6 and LIF have also been described (Novick *et al.*, 1989; Layton *et al.*, 1992), and these can bind their respective ligand with a similar low affinity to their transmembrane counterparts in the absence of gp130 (Taga *et al.*, 1989; Layton *et al.*, 1992; Ward *et al.*, 1995). Soluble IL-6R

can associate with cell surface gp130 in the presence of IL-6 and transduce a signal (Taga *et al.*, 1989). Although the naturally occurring soluble IL-11R $\alpha$  has not been isolated, recombinant forms can mediate an IL-6 type response in the presence of IL-11 in cells that express gp130 but not the transmembrane IL-11R $\alpha$  (Baumann *et al.*, 1996; Karow *et al.*, 1996; Neddermann *et al.*, 1996). Therefore, the biological activities of IL-6, LIF and IL-11 are all affected by their soluble receptors.

Immunoreactive gp130 is up-regulated in glandular epithelial cells from fertile women between days LH + 6 and LH + 13 compared with other stages of the menstrual cycle (Sherwin *et al.*, 2002). Furthermore, soluble gp130 is secreted from endometrial biopsies obtained from women between days 20 and 26 of the menstrual cycle at a 20-fold higher concentration compared with secretion from proliferative phase tissue (Sherwin *et al.*, 2002). Importantly, secretion of soluble gp130 from endometrial biopsies is reduced in infertile women compared with fertile women between days LH + 6 and LH + 13 (Sherwin *et al.*, 2002). By contrast, there is no difference in secretion of soluble IL-6-R between the same infertile and fertile women (Sherwin *et al.*, 2002).

In first-trimester decidua, gp130 immunostaining is confined to glandular epithelial cells and invading cytotrophoblast cells (Classen-Linke *et al.*, 2004). Soluble gp130 is secreted from cultured primary epithelial cells derived from proliferative phase endometrium and first-trimester decidua reaching maximal levels without the addition of hormones. Combined treatment with estrogen and progesterone increased release of soluble gp130 compared to treatment with estrogen alone in these cultures (Classen-Linke *et al.*, 2004). Because the presence of such soluble receptors in the endometrium has important implications in cytokine action, it will be important to establish the functional significance of these findings.

### STAT

The importance of the JAK/STAT signal-transduction pathway in embryo implantation has been demonstrated by the embryonic lethality of STAT3-deficient mice (Takeda *et al.*, 1997). Interestingly, STAT3-deficient embryos implant but die rapidly due to placental defects (Takeda *et al.*, 1997), indicating that LIF and IL-11 can utilize alternative signalling pathways during implantation and decidualization. In the mouse uterus, LIF acts primarily through the activation of STAT3 (Cheng *et al.*, 2001). Similarly, in human endometrial stromal cells, IL-11 acts via activated STAT3 (Dimitriadis and Salamonsen, 2003; Underhill-Day *et al.*, 2003). It remains to be determined when phosphorylated-STAT3 can be detected in human endometrium as this will indicate when the signal-transduction pathway is activated. Interestingly, STAT3 protein production is stimulated by progesterone (Dimitriadis *et al.*, 2003) and is activated by IL-11 in human endometrial stromal cells *in vitro* (Dimitriadis *et al.*, 2003; Underhill-Day *et al.*, 2003). Furthermore, a role for STAT3 activity in trophoblast invasiveness has also been proposed (Corvinus *et al.*, 2003).

### SOCS

The SOCS protein family consists of eight members: cytokine-inducible Src-homology 2 (SH2) domain-containing protein (CIS) and SOCS1–7 (Hilton, 1999). SOCS proteins are up-regulated in response to cytokine stimulation and inhibit cytokine-induced

signalling pathways. SOCS proteins therefore form part of a classical negative feedback circuit. Deletion of the SOCS3 gene in mice causes embryonic lethality due to placental defects (Roberts *et al.*, 2001). Little is known about the expression of SOCS proteins in human endometrium. SOCS1–3 mRNA and protein are expressed in human term placenta and decidua (Blumenstein *et al.*, 2002). Furthermore, SOCS2 and 3 mRNA expression in endothelial cells from placental villi is up-regulated in women with umbilical placental vascular disease, indicating that these are major negative regulators in umbilical placental microvessel endothelial cell activation pathways (Wang *et al.*, 2003). The expression and role of the SOCS proteins in cycling endometrium and first-trimester decidua and placenta remain to be determined.

The embryonic lethality of SOCS3 deficiency is thought to be a consequence of enhanced LIF activation and excessive trophoblast giant cell differentiation. Inactivation of the LIF receptor rescues SOCS3-deficient mice from embryonic lethality (Takahashi *et al.*, 2003), demonstrating that uncontrolled LIF signalling is most likely responsible for this phenotype. However, LIF has not been localized in trophoblast giant cells in mice, and it is possible that other gp130 cytokines known to stimulate SOCS3, such as IL-11 (Auernhammer and Melmed, 1999) that is present in these cells, may contribute to the phenotype (Zourbas *et al.*, 2001).

### Clinical implications

It is thus clear that members of the gp130 cytokine family are appropriately expressed and positioned to have major roles both in the preparation of the endometrium for implantation and during implantation and placental formation. The clear outcomes of functional studies in mice and the reported disturbances in expression of components of the receptor/ligand complexes and signalling/inhibitory molecules in a range of clinical situations suggest that manipulation of one or more of these components in selected women may offer some assistance towards achieving a pregnancy with a successful outcome.

### The TGF $\beta$ superfamily

The TGF $\beta$  superfamily comprises at least 42 distinct mammalian dimeric proteins that share a similar structure (Kingsley, 1994; Piek *et al.*, 1999). These are divided into two subfamilies, the TGF $\beta$ /activin/nodal subfamily and the bone morphogenetic protein (BMP)/müllerian inhibiting substance (MIS)/growth and differentiation factor (GDF) subfamily, which are defined by sequence similarity and the specific signalling pathways that they activate. There are also seven type I receptors, five type II receptors and two classes of Smad signal transducers through which the ligands signal (Shi and Massague, 2003). Specificity and diversity can also be determined by ligand traps (such as follistatin) and accessory receptors (such as betaglycan) (Shi and Massague, 2003). Given the level of complexity of this system, it is probably not surprising that disruption of any one member of the family by gene targeting in mice has not resulted in disruption of implantation (Table I). Furthermore, the lack of a uterine-specific promoter which would enable uterine-specific deletions has made it impossible to establish the importance for implantation of certain family members such as the activins which disrupt earlier events in female reproduction or cause lethality prior to reproductive maturity.

### The TGF $\beta$ s

The TGF $\beta$ s (-1 to -3) are each synthesized as a large precursor molecule from which a propeptide must be cleaved. This occurs before secretion but the propeptide remains attached by a covalent bond. After secretion, most TGF $\beta$  is stored bound to extracellular matrix (ECM) components as a complex of TGF $\beta$ , propeptide and a peptide called latent TGF $\beta$ -binding protein. Release of active TGF $\beta$  from the complex is a critical regulatory step (Sinha *et al.*, 1998). TGF $\beta$ s regulate proliferation and differentiation and have profound effects on ECM production and degradative enzymes: therefore they are important mediators of tissue remodelling (Letterio and Roberts, 1997). Given the complexity of the system, understanding of the actions of TGF $\beta$ s in implantation will require information regarding not only the presence or absence of the ligands and receptors at the trophoblast–endometrial interface, but also knowledge of their state of activation and of the molecules constituting and modulating the TGF $\beta$ -signalling cascades.

In the human endometrium, TGF $\beta$ -1, -2 and -3 have been localized to both epithelial and stromal cells (Gold *et al.*, 1994) with TGF $\beta$ -2 being more intense in the stroma and TGF $\beta$ -1 and -3 of equal intensity in the two cell types (Godkin and Dore, 1998). Only TGF $\beta$ -3 varies across the cycle, being more intense in glandular epithelium during the late secretory phase. Given that the TGF $\beta$ s are produced and stored as latent factors, it is difficult to predict function at implantation. It may be that they remain in their latent forms until the premenstrual rise in urokinase-type plasminogen activator (PA) stimulates activation (Casslen *et al.*, 1998).

Messenger RNA for TGF $\beta$ 1–3 and their receptors have also been detected at the maternal–foetal interface during the first trimester of pregnancy (Ando *et al.*, 1998) with TGF $\beta$  protein in syncytiotrophoblast (Vuckovic *et al.*, 1992). The detection of TGF $\beta$ -binding sites also in a trophoblast cell line (Mitchell *et al.*, 1992) suggests that TGF $\beta$ s may act as autocrine/paracrine factors to regulate placental development and function.

TGF $\beta$ s may play a role in human implantation via their stimulation of fibronectin or vascular endothelial growth factor production (Feinberg *et al.*, 1994; Chung *et al.*, 2000) or by promotion of adhesion of trophoblast cells to the ECM (Irving and Lala, 1995). *In vitro*, TGF $\beta$  can regulate proteins such as insulin-like growth factor binding protein-1 (IGFBP-1) that are abundantly produced in decidual cells (Mazella *et al.*, 2004), whereas trophoblast invasive capacity can be inhibited by treatment with TGF $\beta$ 1, probably by the inhibition of matrix metalloproteinase-9 (MMP-9) and plasmin (Graham and Lala, 1991; Graham, 1997) and/or by overexpression of endoglin, the TGF $\beta$  transmembrane-binding protein (Caniggia *et al.*, 1997b). TGF $\beta$ s are also antiproliferative on first-trimester cytotrophoblast (Morrish *et al.*, 1991; Graham *et al.*, 1992; Li and Zhuang, 1997; Smith *et al.*, 2001) and increase the formation of multinucleated trophoblast cells (Graham *et al.*, 1992). In addition, TGF $\beta$  inhibits production and/or secretion of human chorionic gonadotrophin, human placental lactogen, progesterone and estradiol (Morrish *et al.*, 1991; Song *et al.*, 1996; Luo *et al.*, 2002) from trophoblast cell lines. How many of these *in vitro* actions are functional *in vivo* where the full repertoire of modulators are present remains to be determined.

### Activins

Inhibins and activins are dimeric glycoproteins of the TGF $\beta$  superfamily, which share common  $\beta$  subunits and are functional

antagonists. Inhibin is formed by the dimerization of an  $\alpha$  with one  $\beta$  subunit, whereas activins A, AB and B arise from dimers of  $\beta$ A and  $\beta$ B subunits. Local actions of activins as paracrine regulators of reproductive function (Mather *et al.*, 1992) are now well known. Activin A, in particular, has been attributed with roles in modulating cellular proliferation, differentiation, apoptosis, tissue remodelling and inflammation (Nishihara *et al.*, 1993; Robinson and Hennighausen, 1997; Ying *et al.*, 1997; Yu and Dolter, 1997; Munz *et al.*, 1999). Activins elicit cellular responses through interaction with the serine/threonine kinase receptors (Ethier and Findlay, 2001), activin RI (alk-4) and RII. Ligand binding occurs with a type II receptor, which then recruits and activates a type I receptor leading to signal transduction and promotion of gene expression via selected Smad proteins (Massague and Chen, 2000). Two type II receptors have been identified, ActRIIA and ActRIIB. The local bioactivity of activin is tightly regulated by the co-expression of its binding protein, follistatin, which binds and neutralizes activin with high affinity, by preventing interaction with the type II receptors (Shimonaka *et al.*, 1991).

In the human endometrium during the menstrual cycle and early pregnancy, the synthesis of inhibin/activin subunits varies with cycle stage and as the uterus remodels and differentiates to form the decidua (Petraglia *et al.*, 1990; Leung *et al.*, 1998; Otani *et al.*, 1998; Jones *et al.*, 2000). In non-pregnant endometrium, inhibin/activin $\alpha$ ,  $\beta$ A and  $\beta$ B subunits of mRNA and protein are expressed by glandular and surface epithelium (Leung *et al.*, 1998; Jones *et al.*, 2000). Furthermore, activin A is present in uterine fluid of cycling women (Petraglia *et al.*, 1998). During decidualization, at the end of the menstrual cycle and in early pregnancy, the expression of all subunits is seen in decidualized stroma (Petraglia *et al.*, 1990; Jones *et al.*, 2000). However, at this time,  $\alpha$  subunit is lost from epithelium, whereas  $\beta$ A and  $\beta$ B subunits are maintained in glandular and surface epithelium during early pregnancy. Quantitative mRNA expression studies indicate that expression of all three subunits increases through pregnancy, with maximal expression in third-trimester decidua (Petraglia *et al.*, 1990). Further evidence for the up-regulation of inhibin/activin subunit synthesis with decidualization was obtained from studies where the endometrium was extensively decidualized by the intra-uterine delivery of progestin (Jones *et al.*, 2000) and in gene array studies examining decidualization-related genes (Kao *et al.*, 2002).

The capacity of a particular cell type to produce bioactive inhibin and activin dimers depends on its complement of subunits, and the availability of  $\alpha$  subunit is likely to regulate whether inhibins or activins are produced. Thus in non-pregnant endometrial epithelium, there is potentiality to produce both inhibin and activin dimers, whereas in early pregnancy, only activins will be formed. Indeed, both dimeric inhibin and activin are produced from endometrial epithelial cells *in vitro*, although activin A is at a 35-fold higher concentration than inhibin A (Petraglia *et al.*, 1998). Stromal cells can produce both inhibins and activins only during and following decidualization. Extremely high concentrations of activin A are secreted by stromal cells following *in vitro* decidualization (Jones *et al.*, 2002a), equivalent to levels detectable in maternal serum during the third trimester of pregnancy (Fowler *et al.*, 1998). Dimeric activin A has also been detected immunohistochemically in early pregnancy decidua with an antibody specific for the dimeric form (Otani *et al.*, 1998).

The activin-binding protein, follistatin, is produced in the endometrium by both glandular epithelium and decidualized stromal cells (Jones *et al.*, 2002c), and its expression is significantly elevated in decidual cells in early pregnancy (Otani *et al.*, 1998; Jones *et al.*, 2000). Co-localization of follistatin with activin subunits and receptors in decidualized stromal cells provides evidence for the tight local regulation of activin action in the periimplantation phase. Secretion of follistatin from epithelial cells might be important for restricting the bioavailability of activin within the uterine lumen. Follistatin might also have activin-independent effects, suggested by the distinct phenotypes observed when the genes encoding follistatin and activin  $\beta$ A subunits are deleted or overexpressed (Matzuk *et al.*, 1995; Guo *et al.*, 1998). Follistatin can also bind other members of the TGF $\beta$  superfamily, including inhibin (Shimonaka *et al.*, 1991) and BMPs 2, 4 and 7 (Yamashita *et al.*, 1995; Fainsod *et al.*, 1997), which are expressed strongly in the decidualized mouse uterus (Ying and Zhao, 2000; Paria *et al.*, 2001), but have not yet been reported in the human endometrium.

Inhibin can also regulate activin bioactivity, by competing with activin for binding to ActRII in complex with betaglycan. Betaglycan is synthesized by the human endometrium, in the same cells that express activin receptors and inhibin/activin subunits (Jones *et al.*, 2002c). Betaglycan is also up-regulated in the decidua of early pregnancy, correlating to increased synthesis of inhibin  $\alpha$  subunit by decidualized stromal cells. This implies that inhibin action is important during early implantation/placentation. Betaglycan might also be important for presenting TGF $\beta$ s (particularly TGF $\beta$ 2) to their type II receptor (Lopez-Casillas *et al.*, 1991), enhancing TGF $\beta$  signalling and action in the endometrium and placenta.

The roles of endometrially derived inhibins and activins are not well known. However, mRNA/protein for all receptor subtypes (ActRIA, IB, IIA and IIB) are present in the endometrium, specifically localized only to stromal cells and vascular endothelium (Jones *et al.*, 2002c). Expression is maximal in the early secretory phase and early pregnancy, immediately preceding and during decidualization and implantation. Receptors are also present in isolated endometrial cells in culture (Petraglia *et al.*, 1998).

In both the rodent and the human uterus, the expression patterns of activin, follistatin and activin receptors are consistent with a role in decidualization (Gu *et al.*, 1995; Jones *et al.*, 2000, 2002c). Activin is a potent cytodifferentiation factor (Robinson and Hennighausen, 1997; Ying *et al.*, 1997) and additionally plays an active role in repairing and remodelling tissues (Munz *et al.*, 1999). Activin A promotes decidualization (Jones *et al.*, 2002a; Tierney and Giudice, 2004), an effect that is inhibited by co-treatment with follistatin. Although the downstream targets of activin A in decidual cells have not been explored, in other cell types, activin A stimulates the production of many factors associated with decidualization, such as PGE2, MMP-2 and fibronectin (Petraglia *et al.*, 1993; Caniggia *et al.*, 1997a).

It is probable that the uterine fluid supporting the preimplantation embryo contains maternally derived activin A, and hence potential actions via activin receptors expressed on the blastocyst could be envisaged (Jones *et al.*, 2002b). In many species, activin A is involved in embryogenesis (Smith *et al.*, 1990; Thomsen *et al.*, 1990) and is expressed dynamically with its receptors and binding proteins during early embryonic development (Kimelman *et al.*, 1992; Albano *et al.*, 1994). A similar role has not been verified

in humans, although activin subunits and type I and II receptors are expressed by human blastocysts (He *et al.*, 1999).

Following the initial implantation events, trophoblast cells invade the maternal decidua and therefore are in intimate cell–cell contact with decidualized stromal cells. Activin A produced by decidualized stromal cells (Jones *et al.*, 2002a) might play a further role in augmenting invasion and supporting placental function. Indeed, activin A promotes cytotrophoblast differentiation towards an invasive phenotype and stimulates the production of paracrine agents involved in invasion (Caniggia *et al.*, 1997a), along with the placental hormones, hCG, 17 $\beta$  estradiol and progesterone (Petraglia *et al.*, 1989; Song *et al.*, 1996).

### Macrophage inhibitory cytokine 1

Macrophage inhibitory cytokine 1 (MIC-1) is a divergent member of the TGF $\beta$  superfamily (Bootcov *et al.*, 1997) that is detectable in serum of pregnant women and produced by human placenta where it is localized to syncytiotrophoblast (Moore *et al.*, 2000). More recently, roles for MIC-1 have been identified at the maternal–foetal interface during very early pregnancy. It is produced as endometrial cells undergo decidualization *in vitro* and facilitates this differentiation, consistent with roles for a number of TGF $\beta$  superfamily members in modulating decidualization. MIC-1 also blocks activation of both MMP-2 and MMP-9 in this model (Marjono *et al.*, 2004). This may represent an important mechanism for regulating cytotrophoblast invasion.

### IL-1

IL-1 is a pro-inflammatory cytokine with multiple functions in a range of tissues (Bankers-Fulbright *et al.*, 1996; Dinarello, 1997). The IL-1 system includes two ligands, IL-1 $\alpha$  and IL-1 $\beta$ , the cell-surface receptors, IL-1 receptor type 1 (IL-1R1) and IL-1R2, a non-binding receptor accessory protein (IL-1RAcP) and the naturally occurring receptor antagonist (IL-1ra) which competes with IL-1 for receptor binding. IL-1 $\alpha$  and IL-1 $\beta$  are encoded by different genes but have identical biological activities. Both IL-1 $\alpha$  and IL-1 $\beta$  but not IL-1ra require proteolytic cleavage prior to secretion in their active forms. Soluble forms of IL-1R1 and IL-1R2 are found in serum (Svenson *et al.*, 1993; Giri *et al.*, 1994). The IL-1R1 is found ubiquitously in low numbers, but the IL-1R2 is primarily on white blood cells. Some novel IL-1 ligands which are little characterized have been described as expressed in the uterus: these include IL-1F5 and IL-1F7, but along with other newly discovered ligands and receptors of this family (Sims *et al.*, 2001), their functions are not yet known.

IL-1 $\beta$  signalling is mediated by binding to both the IL-1R1 and IL-1RAcP leading to activation of the Mitogen-activated protein kinase (MAPK) and NF- $\kappa$ B pathways and modulation of target gene transcription. Activity of IL-1 $\beta$  is effectively enhanced in the presence of soluble IL-1R1 (Svenson *et al.*, 1993; Arend *et al.*, 1998) but suppressed in the presence of both cell surface and soluble R2 (Sims *et al.*, 1993; Colotta *et al.*, 1994). IL-1 $\beta$  is independently regulated at the levels of transcription, translation, activation and secretion (Dinarello, 1997). It is generally found within intracellular vesicles or associated with microtubules in cells. Conversion of the latent to the mature form is by the intracellular protease, IL-1 converting enzyme (ICE; caspase-1), and a combination of mature, latent and pro-piece IL-1 is released by the cell.

Extracellular activation of the latent form can result from the non-specific actions of enzymes including elastase, chymase, chymotrypsin and MMP-2, -3 and -9 (Fantuzzi *et al.*, 1997; Schonbeck *et al.*, 1998), whereas prolonged action of MMP-3 results in the degradation of mature IL-1 $\beta$ . The secreted pro-piece also has biological activity as a chemoattractant for fibroblasts (Higgins *et al.*, 1993).

Previous reviews (Robertson *et al.*, 1994; Sharkey, 1998; Salamonsen *et al.*, 2000; Kelly *et al.*, 2001; Fazleabas *et al.*, 2004) have emphasized the conflicting nature of functional studies of IL-1 action on reproduction in mice. Ablation of the genes encoding IL-1 $\beta$ , IL-1R1 or caspase-1 did not result in deficient implantation: however in such models, functional compensation by other systems cannot be excluded. In contrast, a strain-specific blockage of implantation resulted from intraperitoneal injection of IL-1ra at the appropriate time (Simon *et al.*, 1994b), and this was attributed to down-regulation of critical integrins at the luminal epithelial surface. Evidence for such a mechanism also in humans comes from a study in which the integrin subunit was examined in endometrial epithelial cells in culture and shown to be up-regulated either by co-culture with a human pre-implantation embryo or by the addition of IL-1 to the culture medium (Simon *et al.*, 1997a). Furthermore, IL-1 $\beta$  stimulates the secretion of leptin and up-regulation of its receptor Ob-R in endometrial epithelial cells (Gonzalez and Leavis, 2001), and leptin exerts a significantly greater effect on  $\beta$ 3 integrin expression than does IL-1 at similar concentrations. Interestingly, components of the IL-1 family (IL-1 $\beta$ , IL-1Ra, IL-1R1) are up-regulated by leptin in both endometrial epithelial and stromal cells in culture (Gonzalez *et al.*, 2003). Whether leptin is a major regulator of the IL-1 system in the endometrium *in vivo* remains to be established.

All components of the IL-1 system have been examined in the human endometrium and at the maternal–trophoblast interface during implantation. IL-1 $\beta$  mRNA is maximally expressed in the endometrium during the late secretory phase (Kauma *et al.*, 1990) with protein located in endometrial stromal cells, macrophages and endothelial cells (Kauma *et al.*, 1990; Simon *et al.*, 1993). IL-1R1 is present predominantly in glandular epithelium throughout the cycle (Simon *et al.*, 1993) but also in stroma with maximal expression from the mid-late secretory phase (Bigonnesse *et al.*, 2001). Immunoreactive IL-1ra has also been detected throughout the menstrual cycle (Tabibzadeh and Sun, 1992) and in decidua during early implantation (Simon *et al.*, 1994a). During early pregnancy, IL-1 $\beta$  is present in villous cytotrophoblast, syncytiotrophoblast, decidua and activated macrophages (Simon *et al.*, 1994a) at much higher abundance than in non-pregnant endometrium. IL-1R1 is predominant in syncytiotrophoblast and in endometrial glands in early pregnancy, and its mRNA is up-regulated during endometrial stromal cell decidualization *in vitro* (Tierney *et al.*, 2003). Furthermore, recent gene array studies have identified IL-1 $\beta$  as one of the genes most up-regulated by IL-11 during decidualization (White *et al.*, 2004).

All major components of the IL-1 system, IL-1 $\beta$ , IL-1ra and IL-1R1 have been identified at the protein level in single preimplantation embryos, and in some, but not all cases, IL-1 release into culture medium was also detected (Sheth *et al.*, 1991; Zolti *et al.*, 1991; Austgulen *et al.*, 1995; De los Santos *et al.*, 1996; Baranao *et al.*, 1997). Importantly, embryo secretion of IL-1 $\beta$  is stimulated by endometrial factors (De los Santos *et al.*, 1996; Simon *et al.*, 1997b) demonstrating a clear interaction between the maternal



endometrium and embryo prior to implantation. In a study examining single blastomeres, IL-1R1, IL-1 $\beta$  and IL-1ra mRNA were detected in only some of the blastomeres, and the parent preimplantation embryos expressing IL-1ra were more likely to be arrested in early developmental stages (Krussel *et al.*, 1998). Further interactions have been demonstrated at slightly later stages in implantation. Treatment of the human first-trimester trophoblast with IL-1 induced HCG secretion (Yagel *et al.*, 1989), whereas administration of HCG to IVF patients increased their serum IL-1 $\beta$  levels (Karagouni *et al.*, 1998). Some correlations have been demonstrated between IL-1 and success of IVF. Higher levels of IL-1 $\alpha$  were detected in follicular fluid in implantation versus non-implantation cycles although a direct causal relationship was not demonstrated (Karagouni *et al.*, 1998), whereas high concentrations of IL-1 in IVF culture medium correlates with success of implantation (Sheth *et al.*, 1991). *In vitro*, release of IL-1 $\beta$  by cultured cytotrophoblast cells is directly proportional to their invasive capacity (Librach *et al.*, 1994), and IL-1 $\beta$  increases the production of MMP-2 and -9 by JEG-3 trophoblast cells (Karmakar and Das, 2002). *In vivo*, it is therefore likely that decidual IL-1 $\beta$  may act in a paracrine manner by binding to IL-1R1 expressed by trophoblasts and regulating MMP-mediated invasion and HCG secretion.

IL-1 $\beta$  consistently acts to inhibit human endometrial stromal cell decidualization *in vitro* (Kariya *et al.*, 1991; Vicovac *et al.*, 1994; Frank *et al.*, 1995), regardless of the stimulus for decidualization (progesterone or cAMP). It is possible that *in vivo*, the high levels of IL-1ra may provide a mechanism for neutralizing these effects during active decidualization although *in vitro*, the ratio of IL-1 $\beta$  to IL-1ra mRNA remains constant (Huang *et al.*, 2001). Furthermore, in culture, there is diminished responsiveness to exogenous IL-1 $\beta$  as decidualization proceeds (Yoshino *et al.*, 2003).

Other components of decidua may also be influenced by IL-1 $\beta$ . For example, the uNK cells that increase in abundance in the human endometrium during the mid-secretory phase and contribute a major cellular component of the decidua of pregnancy increase their production of granulocyte-macrophage colony-stimulating factor (GM-CSF) in response to IL-1 (Jokhi *et al.*, 1994). Furthermore, IL-15, which is produced by decidualizing endometrial stromal cells and which acts to attract uNK cells, is decreased by IL-1 $\beta$  in culture (Okada *et al.*, 2004). IL-1 $\beta$  also stimulates the production of endothelin (Lin *et al.*, 1998) from cultured endometrial stromal cells, and this may locally regulate vascular tone or cellular proliferation.

Extracellular remodelling is critical to implantation and placentation. IL-1 stimulates production of a number of MMPs and components of the PA/PA-inhibitor cascade from endometrial stromal cells (Singer *et al.*, 1999; Salamonsen and Nie, 2002) and also decreases connexin 43 (Semer *et al.*, 1991). A proportion of fresh and cultured human decidual cells are phagocytic, and this activity is enhanced in the presence of IL-1 and reduced as decidualization proceeds (Ruiz *et al.*, 1997).

Many questions remain regarding the role of the IL-1 system in the human implantation. Current techniques available for analysis of human tissue are limiting. For example, it is not clear whether findings from cell-culture experiments hold *in vivo* where many more paracrine regulators are present; epithelial-stromal interactions are likely to be important. In particular, decidual cells release only low to undetectable levels of mature IL-1 in culture in spite

of the presence of substantial mRNA and intracellular protein (Montes *et al.*, 1995; Huang *et al.*, 2001; White *et al.*, unpublished observations). It could be predicted that release of stimuli from surrounding cells, such as uNK cells or macrophages, may be necessary for its release. Techniques which enable careful reconstitution of the *in vivo* situation using the full cohort of human cells of endometrial, leukocyte and trophoblast origin will be required to even partly recapitulate the *in vivo* situation.

### IL-15

IL-15 is a 14–15kDa member of the four  $\alpha$ -helix bundle cytokine family which includes IL-2. Its effects are mediated by a trimeric membrane receptor comprising the IL-2 receptor  $\beta$ - and  $\alpha$ -chains and a specific  $\alpha$ -chain. It promotes activation of neutrophils, macrophages and T cells, but importantly, is a core chemokine that controls lymphocyte function and maintenance (Kang and Der, 2004). IL-15 is essential for NK cell development in bone marrow and stimulates the proliferation, cytokine production and cytotoxicity of activated blood NK cells (Burton *et al.*, 1994; Carson *et al.*, 1994, 1995; Seder *et al.*, 1995). NK cells of the CD5<sup>bright</sup>, CD16<sup>+</sup> phenotype are a major leukocyte population in the mid-late secretory endometrium and first-trimester decidua and themselves are a source of immunoregulatory chemokines including GM-CSF, IL-10, IL-13 and interferon- $\gamma$ . IL-15 is reported to be essential for type 2 cytokine production by these cells (Cooper *et al.*, 2001; Eriksson *et al.*, 2004) and also affects their proliferation. Unlike its effects on blood NK cells, it does not transform the uNK cells into potent cytolytic cells (Verma *et al.*, 2000). This is critically important for a cell that is present at the maternal-foetal interface where cytolytic activity would destroy trophoblast. It is therefore reasonable to assume that in the human uterus, IL-15 may play a role in promoting uNK cell survival and expansion as has been proposed for mice (Verma *et al.*, 2000).

IL-15 mRNA and protein have been demonstrated in non-pregnant human endometrium, decidua and placenta (Kitaya *et al.*, 2000; Okada *et al.*, 2000b; Verma *et al.*, 2000) with the protein being immunolocalized perivascularly in secretory phase stromal cells, in glandular epithelial cells during the proliferative phase (Kitaya *et al.*, 2000) and in decidua in the first trimester of pregnancy (Kitaya *et al.*, 2000). Macrophages are also an important source of IL-15 in the uterus (Verma *et al.*, 2000). Two different mRNA isoforms are present in the endometrium; one representing a secreted protein and another which encodes a cytoplasmic form (Verma *et al.*, 2000).

IL-15 mRNA expression and protein secretion increase during *in vitro* decidualization of endometrial stromal cells in culture, although there are some discrepancies in the literature, likely because of the different culture conditions used. It is clear that cells decidualized using either cAMP or progesterone show enhanced IL-15 mRNA expression and protein secretion (Kitaya *et al.*, 2000; Okada *et al.*, 2000a; Dunn *et al.*, 2002) and that this is further enhanced in the presence of interferon- $\gamma$  although the latter cytokine alone cannot stimulate IL-15 production. The probable source of interferon- $\gamma$  in the endometrium is the uNK cells (Dunn *et al.*, 2002), and thus the likelihood exists of enhancement of IL-15 production from decidualizing cells by adjacent uNK cells. IL-1 $\beta$  appears to play an opposing role as it acts as a negative regulator of IL-15 mRNA and protein during *in vitro* decidualization



(Okada *et al.*, 2004) and may act to prevent abnormally high levels of IL-15 in early decidua. Interestingly, in women with unexplained recurrent abortion, there are elevated levels of endometrial IL-15 compared with control endometrium (Chegini *et al.*, 2002). This was not however examined in the decidua of early pregnancy or related to the uNK cell number or phenotype in the tissue.

### The CSF

CSF-1 is a homodimeric protein that modulates proliferation, differentiation and survival of numerous cell types (Stanley *et al.*, 1983). Its receptor, *c-fms*, possesses intrinsic tyrosine kinase activity. Mice devoid of CSF-1 show impaired preimplantation embryo development (Pollard, 1997) and a low rate of mating due to ovulation and libido effects, but when they do mate, about 95% of inseminated females become pregnant and deliver viable litters (Pollard *et al.*, 1991). In the human, CSF-1 protein is much higher in the pregnant than the non-pregnant endometrium and is high in the placenta throughout pregnancy (Kauma *et al.*, 1991; Daiter *et al.*, 1992). Expression of CSF-1 and *c-fms* is apparent in the human first-trimester cytotrophoblast, but the function of the cytokine in placentation is not clear. *In vitro* functional studies are conflicting, with CSF-1 both stimulating and inhibiting proliferation of trophoblast cells (Lewis *et al.*, 1996; Hamilton *et al.*, 1998) probably reflecting differences in the cell lines used.

GM-CSF has well-defined effects on survival, proliferation and differentiation of myeloid leukocytes and their precursors (Metcalf, 1989). Similar to CSF-1, GM-CSF is synthesized in the human uterus by endometrial luminal and glandular epithelial cells suggesting that it may be secreted into the uterine lumen. Messenger RNA for GM-CSF is maximal in the mid-secretory phase, coinciding with the 'window of implantation' (Zhao and Chegini, 1999). In contrast, GM-CSF receptor mRNA is located primarily in endothelial cells associated with spiral arterioles, stromal cells and inflammatory cells. In the mouse, a surge of GM-CSF is induced following mating by TGF $\beta$  in the seminal plasma (in the mouse, seminal plasma is deposited in the uterine lumen), and this is accompanied by a dramatic influx of GM-CSF-responsive leukocytes (Tremellen *et al.*, 1998). These leukocytes are likely to play roles in mediating the tissue remodelling required to accommodate pregnancy. In mice rendered null for GM-CSF, implantation rates are normal and viable pups are produced; however, these pups are small and often die late in gestation due to abnormalities in the relative proportions of the different cell types contributing to the placenta (Robertson *et al.*, 1999). Interestingly, GM-CSF added to culture medium alleviates the adverse effects of embryo culture on subsequent foetal growth trajectory and placental morphogenesis (Sjoblom *et al.*, 2005). It has also been suggested that pregnancy outcome in humans is improved following embryo culture in endometrial culture medium with a GM-CSF content greater than 130 pg/ml prior to transfer (Spandorfer *et al.*, 1998).

### Chemokines

Chemokines are a large superfamily of structurally and functionally related cytokines with chemotactic activity targeted at specific leukocyte populations. More than 50 chemokines have been identified to date, but there is a large degree of redundancy and overlap of functions (Murphy *et al.*, 2000; Bacon *et al.*, 2002; Rabin *et al.*,

2003). There are four major subfamilies of chemokines, based on the relative positions of their cysteine residues (CC, CXC, C and CX<sub>3</sub>C) (Luster, 1998). The original random naming of chemokines has recently been systematized (Thorpe, 2002). Chemokine receptors are G-protein-coupled cell surface receptors which are named depending upon the structure of their ligand (thus, CCR and CXCR). The relatively small number of receptors relative to ligands adds an additional level of redundancy.

Chemokine binding to receptors on specific leukocyte subsets can increase leukocyte adhesion to the endothelium through the up-regulation of adhesion molecules and hence promote extravasation. Chemotaxis then occurs along a concentration gradient of chemokines. Marked morphological changes can be seen within leukocytes following chemokine binding: the cytoskeleton is rearranged, integrin-mediated focal adhesions are formed and the cell binds and detaches from the substrate in a coordinated manner, with extension and retraction of pseudopods responsible for directional migration (Bokoch, 1995; Ward *et al.*, 1998).

Chemokines play important roles in both homing of leukocytes to specific regions within a tissue and as potent activators of leukocytes (Papadakis *et al.*, 2000; Kunkel and Butcher, 2003). Importantly, the sequential or combinatorial action of multiple chemokines is probably necessary for the recruitment, homing and activation of a single leukocyte subtype (Vaday *et al.*, 2001). Chemokines act locally and are rapidly and transiently induced in response to an inflammatory stimulus. However, there is recent evidence for the constitutive expression of certain chemokines that are responsible for immunosurveillance and tissue homeostasis (Zlotnik and Yoshie, 2000; Caux *et al.*, 2002; Kunkel and Butcher, 2003). Additional complexity is added by chemokine processing, which further regulates their bioactivity and specificity: such processing is achieved by the actions of MMPs and other proteases (Overall *et al.*, 2002; Van den Steen *et al.*, 2003a,b; Van Damme *et al.*, 2004), many of which are secreted by leukocytes following chemokine stimulation. For example, fractalkine is rapidly cleaved from its transmembrane location by proteolytic enzymes including MMP-9 and released as a soluble chemokine (Bazan *et al.*, 1997) which appears to have different chemotactic properties to the bound form and additionally can antagonize monocyte chemotactic protein-1 (MCP-1) action (Vitale *et al.*, 2004).

There is a large accumulation of leukocytes in the endometrium in the periimplantation phase of the human menstrual cycle and during early pregnancy (Bulmer *et al.*, 1991; King *et al.*, 1995; Salamonsen and Woolley, 1999). These are present scattered throughout the stroma, but also seem to be specifically targeted to areas of decidualization. Decidual-/pregnancy-associated leukocytes are predominantly a subpopulation of macrophages and uNK cells (King *et al.*, 1995; Ozenci *et al.*, 2001). uNK cells begin to infiltrate the endometrium on day LH + 3, specifically accumulate around spiral arterioles and areas of decidualized stroma, and are present in the decidua until the second trimester of pregnancy (Moffett-King, 2002). This highly specialized population of immune cells is a fundamental component of the implantation site, creating an unique immunological environment permissive to, yet regulating, the invasion of foetal cytotrophoblast cells (King *et al.*, 2000; Moffett-King *et al.*, 2002). Recent evidence from mice lacking NK cells suggests important roles in spiral arteriole remodelling and decidualization (Guimond *et al.*, 1998; Greenwood *et al.*, 2000; Croy *et al.*,

2003). Macrophages comprise 20% of endometrial leukocytes and are present during periods of endometrial proliferation, differentiation and breakdown. There is a marked accumulation of endometrial macrophages specifically in areas of decidualization and trophoblast invasion. These cells are a source of growth factors, cytokines and proteases, creating local microenvironments permissive to tissue remodelling and have been proposed to participate in foetal–maternal interactions in the implantation site (Hunt *et al.*, 2000; Heikkinen *et al.*, 2003; Trundley and Moffett, 2004). Therefore, the recruitment and activation of these two distinct groups of leukocyte subpopulations must be tightly and specifically regulated at the time of embryo implantation. This is likely to be achieved by chemokines.

There have been a number of reports describing the expression and regulation of individual chemokines in the endometrium, including IL-8, MCPs-1 and -2, macrophage inhibitory protein (MIP)-1 $\beta$ , eotaxin and regulated on activation and normally T cell expressed and presumably secreted (RANTES; Hornung *et al.*, 1997; Jones *et al.*, 1997; Akiyama *et al.*, 1999; Zhang *et al.*, 2000; Hampton *et al.*, 2001). More recently, an unbiased gene array approach has provided information on the most abundant chemokines expressed by the endometrium, and interestingly many of those previously studied are not among the nine most abundant (Jones *et al.*, 2004). The expression studies were supported by immunolocalization of chemokine protein within the tissue, and the varying cellular localization across the cycle determined. Because chemokines are short lived and very locally acting, identification of cellular location also provides invaluable indicators of function.

Chemokines produced in the decidualizing stromal cells during the mid-late secretory phase of the cycle are likely to be

important for recruitment of the NK cells and macrophages that are a component of the decidua. Indeed, most of the chemokines produced by decidualized stromal cells at this time (macrophage-derived chemokine (MDC), MCP-3, fractalkine (FKN), 6Ckine, MIP-1 $\beta$ ) are potent NK cell chemoattractants (Jones *et al.*, 2004). The precursor uNK cells in blood (CD56+CD16-) bear receptors for and migrate strongly in response to 6Ckine and to a lesser extent MIP-1 $\beta$  and MCP-3 (Taub *et al.*, 1995; Polentarutti *et al.*, 1997; Robertson *et al.*, 2000). During the first trimester of pregnancy, chemokines within the decidua are likely to be important for leukocyte trafficking towards the maternal blood vessels: additional chemokines identified in such cells are granulocyte chemotactic protein (GCP-2), inositol phosphate-10 (IP-10), interferon-inducible T-cell alpha chemoattractant (I-Tac), BRAK, MCP-1 and MIP-1 $\alpha$  (Drake *et al.*, 2001; Red-Horse *et al.*, 2001; Dominguez *et al.*, 2003b; Kitaya *et al.*, 2003).

Leukocyte recruitment has many features in common with trophoblast invasion and trafficking, and it is therefore likely that chemokines play an important role in implantation. During the apposition phase, the blastocysts must find a location on the endometrial epithelium to implant. In the subsequent invasion phase, the trophoblast must traverse first the epithelial basement membrane and then the decidua to reach the uterine blood vessels. Evidence is now accumulating to support a biologically relevant role for chemokines in these processes (Simon *et al.*, 1998; Red-Horse *et al.*, 2001; Dominguez *et al.*, 2003b; Drake *et al.*, 2004; Hannan *et al.*, 2004a).

Tables II and III summarize the current published data for chemokine and receptor expression in the preimplantation blastocyst, in the endometrial epithelium in the mid-secretory phase of the cycle

**Table II.** Chemokines expressed at the embryo–maternal interface during implantation and placentation

| Systematic name | Human ligand         | Receptor         | Ligand localization |                                      |                |                          |
|-----------------|----------------------|------------------|---------------------|--------------------------------------|----------------|--------------------------|
|                 |                      |                  | Blastocyst          | Endometrial epithelium mid-secretory | Decidual cells | Invasive cytotrophoblast |
| CXCL6           | GCP-2                | CXCR1, CXCR2     | Not tested          | Not tested                           | Present        | Present                  |
| CXCL8           | IL-8                 | CXCR1, CXCR2     | Not present         | Present/<br>not present              | Not tested     | Not tested               |
| CXCL10          | IP-10                | CXCR3            | Not tested          | Not tested                           | Present        | Not tested               |
| CXCL11          | I-TAC                | CXCR3            | Not tested          | Not tested                           | Present        | Not tested               |
| CXCL12          | SDF-1 $\alpha/\beta$ | CXCR4            | Not tested          | Not tested                           | Not tested     | Present                  |
| CXCL14          | BRAK                 | Unknown          | Not tested          | Not tested                           | Present        | Not tested               |
| CX3CL1          | Fractalkine          | CX3CR1           | Not tested          | Present                              | Present        | Not tested               |
| CCL1            | MCP-1                | CCR2             | Not present         | Present                              | Present        | Not tested               |
| CCL3            | MIP-1 $\alpha$       | CCR1, CCR5       | Not tested          | Not tested                           | Present        | Present                  |
| CCL4            | MIP-1 $\beta$        | CCR5             | Not tested          | Present                              | Present        | Not tested               |
| CCL5            | RANTES               | CCR1, CCR3, CCR5 | Not present         | Not tested                           | Not tested     | Not tested               |
| CCL7            | MCP-3                | CCR1, CCR2, CCR3 | Not tested          | Present                              | Present        | Not tested               |
| CCL11           | Eotaxin              | CCR3             | Not tested          | Present                              | Present        | Not tested               |
| CCL14           | HCC-1                | CCR1, CCR5       | Not tested          | Present                              | Present        | Present                  |
| CCL16           | HCC-4                | CCR1, CCR2       | Not tested          | Present                              | Present        | Not tested               |
| CCL21           | 6Ckine               | CCR7             | Not tested          | Present                              | Present        | Not tested               |
| CCL22           | MDC                  | CCR4             | Not tested          | Present                              | Present        | Not tested               |

IP, inositol phosphate; MCP, monocyte chemotactic protein; RANTES, regulated on activation and normally T cell expressed and presumably secreted. GCP, granulocyte chemotactic protein; I-Tac, interferon-inducible T-cell alphachemoattractant; SDF stroma cell derived factor; MIP, macrophage inhibitory protein; HCC, haemofiltrate CC chemokine; MDC, macrophage derived chemokine.

Data derived from Hampton *et al.* (1999); Jones *et al.* (2000), (2004); Zhang *et al.* (2000); Douglas and Thirkill (2001); Drake *et al.* (2001); Red-Horse *et al.* (2001); Caballero–Campo *et al.* (2002); Dominguez *et al.* (2003b); Kitaya *et al.* (2003); Mulayim *et al.* (2003); Sato *et al.* (2003); Hannan *et al.* (2004a).

**Table III.** Chemokine receptors at the embryo–maternal interface during implantation and placentation

| Receptor | Blastocyst<br>inner cell mass | Trophectoderm | Endometrial<br>epithelium,<br>mid-secretory | Invasive<br>cytotrophoblast | Syncytiotrophoblast |
|----------|-------------------------------|---------------|---------------------------------------------|-----------------------------|---------------------|
| CCR1     | Not tested                    | Not tested    | Not tested                                  | Present                     | Not present         |
| CCR2B    | Present                       | Not tested    | Not tested                                  | Not tested                  | Not tested          |
| CCR3     | Not tested                    | Not tested    | Present                                     | Not tested                  | Not tested          |
| CCR5     | Not tested                    | Present       | Present                                     | Present                     | Not present         |
| CCR8     | Not tested                    | Not tested    | Not tested                                  | Not tested                  | Not present         |
| CXCR1    | Not present                   | Not present   | Present                                     | Not tested                  | Not tested          |
| CXCR2B   | Not tested                    | Not tested    | Present                                     | Present                     | Not tested          |
| CXCR4    | Not present                   | Not present   | Present                                     | Not tested                  | Present             |
| CX3CR1   | Not tested                    | Not tested    | Present                                     | Present                     | Not tested          |

Data derived from Drake *et al.* (2001); Douglas and Thirkill, (2001); Mulayim *et al.* (2003); Dominguez *et al.* (2003a); Sato *et al.* (2003); Hannan *et al.* (2004a).

and in decidual cells and invasive cytotrophoblast. To date, no chemokines have been identified in preimplantation blastocysts or their culture medium but the receptors CCR2B and CCR5 have been localized in the inner cell mass and trophectoderm, respectively (Dominguez *et al.*, 2003a). The uterine epithelium in the mid-secretory phase strongly expresses fractalkine, MIP-1 $\beta$ , MCP-3, eotaxin, HCC-1, HCC-4, 6CKine and MDC, whereas MCP-3 is weakly expressed (Zhang *et al.*, 2000; Hampton *et al.*, 2001; Hannan *et al.*, 2004a; Jones *et al.*, 2004). Chemokine receptors (CXCR1, CXCR4, CCR5 and CCR2B) are also detectable in the human endometrial epithelium during the receptive phase. Thus, it could be predicted that chemokines released into the uterine lumen, or on the surface of the luminal epithelium, play a role in the apposition and adhesion phases of human implantation.

Both chemokines and receptors have been identified on invasive cytotrophoblast during the first trimester of pregnancy, and these include CGP-2, stromal cell-derived factor (SDF)-1 and MIP-1 $\alpha$  (Drake *et al.*, 2001; Red-Horse *et al.*, 2001) and the receptors CCR1 CCR2B, CCR5, CXCR2B and CX3CR1 (Drake *et al.*, 2001; Dominguez *et al.*, 2003a; Sato *et al.*, 2003). Chemokine receptors (CX3CR1, CCR1, 2 and 3) have also been detected on some trophoblast cell lines (Hannan *et al.*, 2004b). In addition, in floating and anchoring villi, nearly every chemokine targeted for study was expressed by predominantly two cell types, fibroblasts and macrophages. Cytotrophoblast progenitors in floating villi expressed a broad repertoire of chemokine receptors suggesting that cytotrophoblasts are poised to respond to chemokine signals at the maternal–foetal interface (Drake *et al.*, 2004).

From these studies, it is clear that chemokines will be important determinants of successful implantation and placentation by their actions in chemoattracting leukocytes which are critical players at the embryo–maternal interface, by their actions on trophoblast migration and by additional functions such as cell proliferation and modification of adhesion molecule expression. Interestingly, none of the chemokine receptor knockout mice generated thus far have been reported to have reduced fertility (Power, 2003): this may reflect the redundancy in the system, but it may also be that as for a number of other genetically modified mice, small effects on fertility would not be recorded by laboratories for which this is not a major interest.

## Conclusions and clinical implications

From the above, it is clear that cytokines are critical contributors to the events of implantation, from their effects on the blastocyst within the uterine lumen, through the phases of initial attraction and attachment to the endometrium, to effects on preparation of the endometrium for pregnancy by formation of the decidua. They also exert effects on the subsequent trafficking of the trophoblast through the prepared endometrium to invade the blood vessels and hence allow provision of nutrients for the developing foetus. These events are summarized in Figure 2.

Although expression of many cytokines (or associated molecules) is disturbed in cohorts of women with disorders associated with establishment and maintenance of pregnancy, it is also evident that there is not a single cytokine whose expression is either increased or decreased in tissue or fluids from all women with a particular disorder. In combination with what is now known of the complexity of the above systems, this suggests that it is unlikely that manipulation of any one cytokine or accessory molecule will provide ‘quick fix’ solutions to clinicians’ requirements. These needs include rapid identification of a receptive endometrium or blastocyst guaranteed to implant, manipulation of the embryo–maternal environment to improve fertility, or provision of fail-safe post-coital contraception.

Taking the need for detection of a receptive endometrium as an example, what is required is the identification of a ‘fingerprint’ for analysis, which includes a number of factors known to alter in the mid-secretory phase, of which some but not necessarily all may be disturbed in an individual with infertility. Cytokine fingerprints could be deduced from the literature, given the wealth of studies on individual cytokines and data from microarray analysis, much of which is summarized here. The deduced fingerprint would then require substantial testing in appropriately selected clinical material. New research should include analyses of clinical material such as endometrium from women with or without infertility, using sensitive proteomic systems. These hold great potential for identifying a clinically useful fingerprint because they can identify proteins in their post-translationally modified and hence biologically relevant forms.

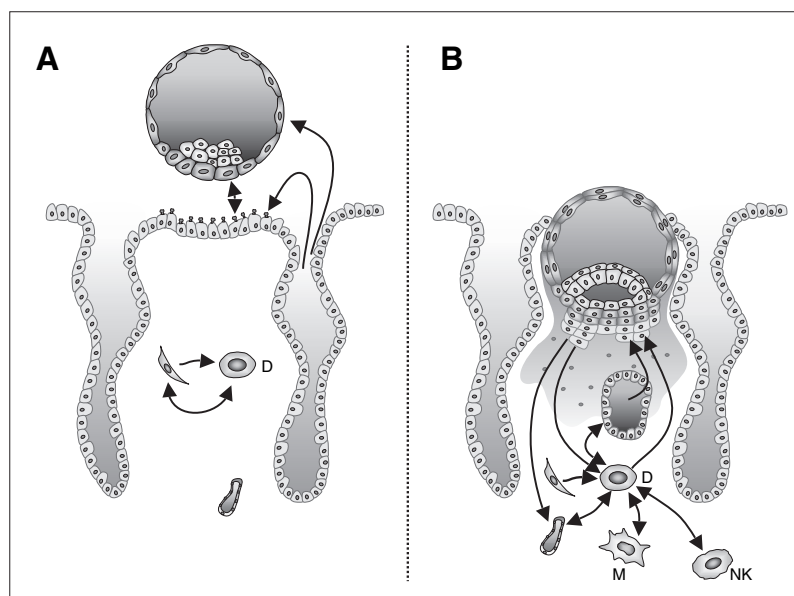

**Figure 2.** Cross-talk between trophoblast and endometrium, preimplantation (A) and immediately post-implantation (B) is mediated, in part, by cytokines in the directions shown by the arrows. During the preimplantation phase, cytokines are secreted by uterine glands, by stromal fibroblasts and decidual cells (D) and by trophoblast. These can act separately or in concert on trophoblast, on endometrial epithelium and during decidualization. Once trophoblast invasion is in progress, an array of cytokines produced by glands, decidual cells and leukocytes [predominantly uterine-specific natural killer (uNK) cells and macrophages] are likely to promote cellular differentiation, trafficking of leukocytes and trophoblast and continuing decidualization.

## References

- Abbondanzo SJ, Cullinan EB, McIntyre K, Labow MA and Stewart CL (1996) Reproduction in mice lacking a functional type 1 IL-1 receptor. *Endocrinology* 7,3598–3601.
- Aghajanova L, Stavreus-Evers A, Nikas Y, Hovatta O and Landgren BM (2003) Coexpression of pinopodes and leukemia inhibitory factor, as well as its receptor, in human endometrium. *Fertil Steril* 79,808–814.
- Ain R, Trinh ML and Soares MJ (2004) Interleukin-11 signaling is required for the differentiation of natural killer cells at the maternal–fetal interface. *Dev Dyn* 231,700–708.
- Akiyama M, Okabe H, Takakura K, Fujiyama Y and Noda Y (1999) Expression of macrophage inflammatory protein-1 alpha (MIP-1alpha) in human endometrium throughout the menstrual cycle. *BJOG* 106,725–730.
- Albano RM, Arkell R, Beddington RS and Smith JC (1994) Expression of inhibin subunits and follistatin during postimplantation mouse development: decidual expression of activin and expression of follistatin in primitive streak, somites and hindbrain. *Development* 120,803–813.
- Alexander WS (2002) Suppressors of cytokine signalling (SOCS) in the immune system. *Nat Rev Immunol* 2,410–416.
- Ando N, Hirahara F, Fukushima J, Kawamoto S, Okuda K, Funabashi T, Gorai I and Minaguchi H (1998) Differential gene expression of TGF-beta isoforms and TGF-beta receptors during the first trimester of pregnancy at the human maternal–fetal interface. *Am J Reprod Immunol* 40,48–56.
- Arend WP, Malyak M, Guthridge CJ and Gabay C (1998) Interleukin-1 receptor antagonist: role in biology. *Annu Rev Immunol* 16,27–55.
- Arici A, Engin O, Attar E and Olive DL (1995) Modulation of leukemia inhibitory factor gene expression and protein biosynthesis in human endometrium. *J Clin Endocrinol Metab* 80,1908–1914.
- Auernhammer CJ and Melmed S (1999) Interleukin-11 stimulates proopiomelanocortin gene expression and adrenocorticotropin secretion in corticotroph cells: evidence for a redundant cytokine network in the hypothalamo-pituitary-adrenal axis. *Endocrinology* 140,1559–1566.
- Austgulen R, Arntzen KJ, Vatten LJ, Kahn J and Sunde A (1995) Detection of cytokines (interleukin-1, interleukin-6, transforming growth factor-beta) and soluble tumour necrosis factor receptors in embryo culture during in-vitro fertilization. *Hum Reprod* 10,171–176.
- Bacon K, Baggolini M, Broxmeyer H, Horuk R, Lindley I, Mantovani A, Maysushima K, Murphy P, Nomiya H, Oppenheim J *et al.* (2002) Chemokine/chemokine receptor nomenclature. *J Interferon Cytokine Res* 22,1067–1068.
- Baird DT, Cameron ST, Critchley HOD, Drudy TA, Howe A, Jones RL, Lea RG and Kelly RW (1996) Prostaglandins and menstruation. *Eur J Obstet Gynecol Reprod Biol* 70,15–17.
- Bankers-Fulbright JL, Kalli KR and McKean DJ (1996) Interleukin-1 signal transduction. *Life Sci* 59,61–83.
- Baranao RI, Piazza A, Rumi LS and Polak de Fried E (1997) Determination of IL-1 and IL-6 levels in human embryo culture-conditioned media. *Am J Reprod Immunol* 37,191–194.
- Baumann H, Wang Y, Morella KK, Lai CF, Dams H, Hilton DJ, Hawley RG and Mackiewicz A (1996) Complex of the soluble IL-11 receptor and IL-11 acts as IL-6-type cytokine in hepatic and nonhepatic cells. *J Immunol* 157,284–290.
- Bazan JF, Bacon KB, Hardiman G, Wang W, Soo K, Rossi D, Greaves DR, Zlotnik A and Schall TJ (1997) A new class of membrane-bound chemokine with a CX3C motif. *Nature* 385,640–644.
- Bigonnesse F, Labelle Y and Akoum A (2001) Triphasic expression of interleukin-1 receptor type I in human endometrium throughout the menstrual cycle of fertile women and women with unexplained infertility. *Fertil Steril* 75,79–87.
- Bilinski P, Roopenian D and Gossler A (1998) Maternal IL-11Ralpha function is required for normal decidua and fetoplacental development in mice. *Genes Dev* 12,2234–2243.
- Blumenstein M, Bowen-Shauver JM, Keelan JA and Mitchell MD (2002) Identification of suppressors of cytokine signaling (SOCS) proteins in human gestational tissues: differential regulation is associated with the onset of labor. *J Clin Endocrinol Metab* 87,1094–1097.
- Bokoch GM (1995) Chemoattractant signaling and leukocyte activation. *Blood* 86,1649–1660.
- Bootcov MR, Bauskin AR, Valenzuela SM, Moore AG, Bansal M, He XY, Zhang HP, Donnellan M, Mahler S, Pryor K *et al.* (1997) MIC-1, a novel macrophage inhibitory cytokine, is a divergent member of the TGF-beta superfamily. *Proc Natl Acad Sci USA* 94,11514–11519.
- Bulmer JN, Longfellow M and Ritson A (1991) Leukocytes and resident blood cells in endometrium. *Ann N Y Acad Sci* 622,57–68.
- Burton JD, Bamford RN, Peters C, Grant AJ, Kurys G, Goldman CK, Brennan J, Roessler E and Waldmann TA (1994) A lymphokine, provisionally designated interleukin T and produced by a human adult T-cell leukemia line, stimulates T-cell proliferation and the induction of lymphokine-activated killer cells. *Proc Natl Acad Sci USA* 91,4935–4939.
- Caballero-Campo P, Dominguez F, Coloma J, Meseguer M, Remohi J, Pellicer A and Simon C (2002) Hormonal and embryonic regulation of chemokines

- IL-8, MCP-1 and RANTES in the human endometrium during the window of implantation. *Mol Hum Reprod* 8,375–384.
- Caniggia I, Lye SJ and Cross JC (1997a) Activin is a local regulator of human cytotrophoblast cell differentiation. *Endocrinology* 138,3976–3986.
- Caniggia I, Taylor CV, Ritchie JW, Lye SJ and Letarte M (1997b) Endoglin regulates trophoblast differentiation along the invasive pathway in human placental villous explants. *Endocrinology* 138,4977–4988.
- Carson WE, Giri JG, Lindemann MJ, Linett ML, Ahdieh M, Paxton R, Anderson D, Eisenmann J, Grabstein K and Caligiuri MA (1994) Interleukin (IL) 15 is a novel cytokine that activates human natural killer cells via components of the IL-2 receptor. *J Exp Med* 180,1395–1403.
- Carson WE, Ross ME, Baiocchi RA, Marien MJ, Boiani N, Grabstein K and Caligiuri MA (1995) Endogenous production of interleukin 15 by activated human monocytes is critical for optimal production of interferon-gamma by natural killer cells in vitro. *J Clin Invest* 96,2578–2582.
- Casslen B, Sandberg T, Gustavsson B, Willen R and Nilbert M (1998) Transforming growth factor beta1 in the human endometrium. Cyclic variation, increased expression by estradiol and progesterone, and regulation of plasminogen activators and plasminogen activator inhibitor-1. *Biol Reprod* 58,1343–1350.
- Caux C, Vanbervliet B, Massacrier C, Ait-Yahia S, Vaure C, Chemin K, Dieu N and Mcand Vicari A (2002) Regulation of dendritic cell recruitment by chemokines. *Transplantation* 73,S7–S11.
- Charnock-Jones DS, Sharkey AM, Fenwick P and Smith SK (1994) Leukaemia inhibitory factor mRNA concentration peaks in human endometrium at the time of implantation and the blastocyst contains mRNA for the receptor at this time. *J Reprod Fertil* 101,421–426.
- Chegini N, Ma C, Roberts M, Williams RS and Ripps BA (2002) Differential expression of interleukins (IL) IL-13 and IL-15 throughout the menstrual cycle in endometrium of normal fertile women and women with recurrent spontaneous abortion. *J Reprod Immunol* 56,93–110.
- Chen HF, Lin CY, Chao KH, Wu MY, Yang YS and Ho HN (2002) Defective production of interleukin-11 by decidua and chorionic villi in human anembryonic pregnancy. *J Clin Endocrinol Metab* 87,2320–2328.
- Chen HF, Chao KH, Shew JY, Yang YS and Ho HN (2004) Expression of leukemia inhibitory factor and its receptor is not altered in the decidua and chorionic villi of human anembryonic pregnancy. *Hum Reprod* 19,1647–1654.
- Cheng JG, Chen JR, Hernandez L, Alvord WG and Stewart CL (2001) Dual control of LIF expression and LIF receptor function regulate Stat3 activation at the onset of uterine receptivity and embryo implantation. *Proc Natl Acad Sci USA* 98,8680–8685.
- Chung IB, Yelian FD, Zaher FM, Gonik B, Evans MI, Diamond MP and Svinarich DM (2000) Expression and regulation of vascular endothelial growth factor in a first trimester trophoblast cell line. *Placenta* 21,320–324.
- Classen-Linke I, Muller-Newen G, Heinrich PC, Beier HM and von Rango U (2004) The cytokine receptor gp130 and its soluble form are under hormonal control in human endometrium and decidua. *Mol Hum Reprod* 10,495–504.
- Colotta F, Dower SK, Sims JE and Mantovani A (1994) The type II 'decoy' receptor: a novel regulatory pathway for interleukin 1. *Immunol Today* 15,562–566.
- Cooper MA, Fehniger TA, Turner SC, Chen KS, Ghaehri BA, Ghayur T, Carson WE and Caligiuri MA (2001) Human natural killer cells: a unique innate immunoregulatory role for the CD56 (bright) subset. *Blood* 97,3146–3151.
- Cork BA, Li TC, Warren MA and Laird SM (2001) Interleukin-11 (IL-11) in human endometrium: expression throughout the menstrual cycle and the effects of cytokines on endometrial IL-11 production in vitro. *J Reprod Immunol* 50,3–17.
- Cork BA, Tuckerman EM, Li TC and Laird SM (2002) Expression of interleukin (IL) -11 receptor by the human endometrium in vivo and effects of IL-11, IL-6 and LIF on the production of MMP and cytokines by human endometrial cells in vitro. *Mol Hum Reprod* 8,841–848.
- Corvinus FM, Fitzgerald JS, Friedrich K and Markert UR (2003) Evidence for a correlation between trophoblast invasiveness and STAT3 activity. *Am J Reprod Immunol* 50,316–321.
- Croy BA, Esadeg S, Chantakru S, van den Heuvel M, Paffaro VA, He H, Black GP, Ashkar AA, Kiso Y and Zhang J (2003) Update on pathways regulating the activation of uterine natural killer cells, their interactions with decidual spiral arteries and homing of their precursors to the uterus. *J Reprod Immunol* 59,175–191.
- Cullinan EB, Abbondanzo SJ, Anderson PS, Pollard JW, Lessey BA and Stewart CL (1996) Leukemia inhibitory factor (LIF) and LIF receptor expression in human endometrium suggests a potential autocrine/paracrine function in regulating embryo implantation. *Proc Natl Acad Sci USA* 93,3115–3210.
- Daiter E, Pampfer S, Yeung YG, Barad D, Stanley ER and Pollard JW (1992) Expression of colony-stimulating factor-1 in the human uterus and placenta. *J Clin Endocrinol Metab* 74,850–858.
- De los Santos MJ, Mercader A, Frances A, Portoles E, Remohi J, Pellicer A and Simon C (1996) Role of endometrial factors in regulating secretion of components of the immunoreactive human embryonic interleukin-1 system during embryonic development. *Biol Reprod* 54,563–574.
- Dimitriadis E, Salamonsen LA and Robb L (2000) Expression of interleukin-11 during the human menstrual cycle: coincidence with stromal cell decidualization and relationship to leukaemia inhibitory factor and prolactin. *Mol Hum Reprod* 6,907–914.
- Dimitriadis E, Robb L and Salamonsen LA (2002) Interleukin 11 advances progesterone-induced decidualization of human endometrial stromal cells. *Mol Hum Reprod* 8,636–643.
- Dimitriadis E and Salamonsen L (2003) Crosstalk between progesterone and interleukin-11 signal transduction pathways in human endometrial stromal cells during decidualization. *Reprod Fertil Dev* 15,73.
- Dimitriadis E, Robb L, Liu YX, Enders AC, Martin H, Stoikos C, Wallace EM and Salamonsen LA (2003) IL-11 and IL-11Ralpha immunolocalisation at primate implantation sites supports a role for IL-11 in placentation and fetal development. *Reprod Biol Endocrinol* 1,34.
- Dimitriadis E, Stoikos C, Baca M, Fairlie WD, McCoubrie JE and Salamonsen LA (2005) Relaxin, progesterone and prostoglandin E2 regulate interleukin 11 during human endometrial stromal cell decidualization. *J Clin Endocrinol Metab* 90,3458–3465.
- Dinarelo CA (1997) Interleukin-1. *Cytokine Growth Factor Rev* 8,253–265.
- Dominguez F, Galan A, Martin JJ, Remohi J, Pellicer A and Simon C (2003a) Hormonal and embryonic regulation of chemokine receptors CXCR1, CXCR4, CCR5 and CCR2B in the human endometrium and the human blastocyst. *Mol Hum Reprod* 9,189–198.
- Dominguez F, Pellicer A and Simon C (2003b) The chemokine connection: hormonal and embryonic regulation at the human maternal-embryonic interface – a review. *Placenta* 24, S48–S55.
- Douglas GC and Thirkill TL (2001) Chemokine receptor expression by human syncytiotrophoblast – a review. *Placenta* 22,S24–S28.
- Drake PM, Gunn MD, Charo IF, Tsou CL, Zhou Y, Huang L and Fisher SJ (2001) Human placental cytotrophoblasts attract monocytes and CD56 (bright) natural killer cells via the actions of monocyte inflammatory protein 1alpha. *J Exp Med* 193,1199–1212.
- Drake PM, Red-Horse K and Fisher SJ (2004) Reciprocal chemokine receptor and ligand expression in the human placenta: implications for cytotrophoblast differentiation. *Dev Dyn* 229,877–885.
- Du XX and Williams DA (1994) Interleukin-11: a multifactorial growth factor derived from the hematopoietic microenvironment. *Blood* 83,2023–2030.
- Dunn CL, Critchley HO and Kelly RW (2002) IL-15 regulation in human endometrial stromal cells. *J Clin Endocrinol Metab* 87,1898–1901.
- van Eijk MJ, Mandelbaum J, Salat-Baroux J, Belaisch-Allart J, Plachot M, Junca AM and Mummery CL (1996) Expression of leukaemia inhibitory factor receptor subunits LIFR beta and gp130 in human oocytes and pre-implantation embryos. *Mol Hum Reprod* 2,355–360.
- Eriksson M, Meadows SK, Wira CR and Sentman CL (2004) Unique phenotype of human uterine NK cells and their regulation by endogenous TGF-beta. *J Leukoc Biol* 76,667–675.
- Ethier J-F and Findlay JK (2001) Roles of activin and its signal transduction mechanisms in reproductive tissues. *Reproduction* 121,667–675.
- Fainsod A, Deissler K, Yelin R, Marom K, Epstein M, Pillemer G, Steinbeisser H and Blum M (1997) The dorsaling and neural inducing gene follistatin is an antagonist of BMP-4. *Mech Dev* 63,39–50.
- Fantuzzi G, Ku G and Harding MW (1997) Response to local inflammation of IL-1β converting enzyme-deficient mice. *J Immunol* 158,1818–1824.
- Fazleabas AT, Kim JJ and Strakova Z (2004) Implantation: embryonic signals and the modulation of the uterine environment – a review. *Placenta* 25,S26–S31.
- Feinberg RF, Kliman HJ and Wang CL (1994) Transforming growth factor-beta stimulates trophoblast oncofetal fibronectin synthesis in vitro: implications for trophoblast implantation in vivo. *J Clin Endocrinol Metab* 78,1241–1248.
- Fowler PA, Evans LW, Groome NP, Templeton A and Knight PG (1998) A longitudinal study of maternal serum inhibin-A, inhibin-B, activin-A, activin-AB, pro-alphaC and follistatin during pregnancy. *Hum Reprod* 13,3530–3536.
- Frank GR, Brar AK, Jikihara H, Cedars MI and Handwerger S (1995) Interleukin-1 beta and the endometrium: an inhibitor of stromal cell differentiation and

- possible autoregulator of decidualization in humans. *Biol Reprod* 52,184–191.
- Gemzell-Danielsson K and Swahn M-L (1997) The effects of various doses of mifepristone on endometrial leukaemia inhibitory factor in the midluteal phase – an immunohistochemical study. *Hum Reprod* 12,1293–1297.
- Giri JG, Wells J, Dower SK, McCall CE, Guzman RN, Slack J, Bird TA, Shanebeck K, Grabstein KH and Sims JE (1994) Elevated levels of shed type II IL-1 receptor in sepsis. Potential role for type II receptor in regulation of IL-1 responses. *J Immunol* 153,5802–5809.
- Godkin JD and Dore JJ (1998) Transforming growth factor beta and the endometrium. *Rev Reprod* 3,1–6.
- Gold LI, Saxena BN, Mittal KR, Marmor M, Goswami M, Nactigal L, Korc M and Demopoulos RI (1994) Increased expression of transforming growth factor beta isoforms and basic fibroblast growth factor in complex hyperplasia and adenocarcinoma of the endometrium: evidence for paracrine and autocrine action. *Cancer Res* 54,2347–2358.
- Gonzalez RR and Leavis P (2001) Leptin upregulates beta3-integrin expression and interleukin-1beta, upregulates leptin and leptin receptor expression in human endometrial epithelial cell cultures. *Endocrine* 16,21–28.
- Gonzalez RR, Leary K, Petrozza JC and Leavis PC (2003) Leptin regulation of the interleukin-1 system in human endometrial cells. *Mol Hum Reprod* 9,151–158.
- Graham CH (1997) Effect of transforming growth factor-beta on the plasminogen activator system in cultured first trimester human cytotrophoblasts. *Placenta*, 18,137–143.
- Graham CH and Lala PK (1991) Mechanism of control of trophoblast invasion in situ. *J Cell Physiol* 148,228–234.
- Graham CH, Lysiak JJ, McCrae KR and Lala PK (1992) Localization of transforming growth factor-beta at the human fetal-maternal interface: role in trophoblast growth and differentiation. *Biol Reprod* 46,561–572.
- Greenwood JD, Minhas K, di Santo JP, Makita M, Kiso Y and Croy BA (2000) Ultrastructural studies of implantation sites from mice deficient in uterine natural killer cells. *Placenta* 21,693–702.
- Gu Y, Srivastava RK, Ou J, Krett NL, Mayo KE and Gibori G (1995) Cell-specific expression of activin and its two binding proteins in the rat decidua: role of alpha<sub>2</sub>-macroglobulin and follistatin. *Endocrinology* 136,3815–3822.
- Guimond MJ, Wang B and Croy BA (1998) Engraftment of bone marrow from severe combined immunodeficient (SCID) mice reverses the reproductive deficits in natural killer cell-deficient tg epsilon 26 mice. *J Exp Med* 187,217–223.
- Guo Q, Kumar TR, Woodruff T, Hadsell LA, DeMayo FJ and Matzuk MM (1998) Overexpression of mouse follistatin causes reproductive defects in transgenic mice. *Mol Endocrinol* 12,96–106.
- Hamilton GS, Lysiak JJ, Watson AJ and Lala PK (1998) Effects of colony stimulating factor-1 on human extravillous trophoblast growth and invasion. *J Endocrinol* 159,69–77.
- Hampton AL, Nie G-Y and Salamonsen LA (1999) Progesterone analogues similarly modulate endometrial matrix metalloproteinase-1 and matrix metalloproteinase-3 and their inhibitor in a model for long term contraceptive effects. *Mol Hum Reprod* 5,365–371.
- Hampton AL, Rogers PA, Affandi B and Salamonsen LA (2001) Expression of the chemokines, monocyte chemoattractant protein (MCP) -1 and MCP-2 in endometrium of normal women and Norplant users, does not support a central role in macrophage infiltration into endometrium. *J Reprod Immunol* 49,115–132.
- Hannan NJ, Jones RL, Critchley HO, Kovacs GJ, Rogers PA, Affandi B and Salamonsen LA (2004a) Coexpression of fractalkine and its receptor in normal human endometrium and in endometrium from users of progestin-only contraception supports a role for fractalkine in leukocyte recruitment and endometrial remodeling. *J Clin Endocrinol Metab* 89,6119–6129.
- Hannan NJ, Jones RL and Salamonsen L (2004b) Expression of chemokines and their receptors at the human maternal-embryonic interface. *Reprod Fertil Dev* 16,78.
- He Z, Liu H, Mele CA, Barmat L, Veeck LL, Davis O and Rosenwaks Z (1999) Expression of inhibin/activin subunits and their receptors and binding proteins in human preimplantation embryos. *J Assist Reprod Genet* 16,73–80.
- Heaney ML and Golde DW (1996) Soluble cytokine receptors. *Blood* 87,847–857.
- Heikkinen J, Mottonen M, Komi J, Alanen A and Lassila O (2003) Phenotypic characterization of human decidual macrophages. *Clin Exp Immunol* 131,498–505.
- Heinrich PC, Behrmann I, Muller-Newen G, Schaper F and Graeve L (1998) Interleukin-6-type cytokine signalling through the gp130/Jak/STAT pathway. *Biochem J* 334,297–314.
- Higgins GC, Foster JL and Postlethwaite AE (1993) Synthesis and biological activity of human interleukin-1 $\beta$  propiece *in vitro*. *Arthritis Rheum* 39,S153.
- Hilton DJ (1992) LIF: lots of interesting functions. *Trends Biochem Sci* 17,72–76.
- Hilton DJ (1999) Negative regulators of cytokine signal transduction. *Cell Mol Life Sci* 55,1568–1577.
- Hilton DJ, Nicola NA, Gough NM and Metcalf D (1988a) Resolution and purification of three distinct factors produced by Krebs ascites cells which have differentiation-inducing activity on murine myeloid leukaemia cell lines. *J Biol Chem* 263,9238–9243.
- Hilton DJ, Nicola NA and Metcalf D (1988b) Purification of a murine leukaemia inhibitory factor from Krebs ascites conditioned cells. *Anal Biochem* 173,359–367.
- Hornung D, Ryan IP, Chao VA, Schriock ED and Taylor RN (1997) Immunolocalization and regulation of the chemokine RANTES in human endometrial and endometriosis tissues and cells. *J Clin Endocrinol Metab* 82,1621–1628.
- Huang H-Y, Wen Y, Kruessel JS, Raga F, Soong Y-K and Polan ML (2001) Interleukin (IL) -1 $\beta$  regulation of IL-1 $\beta$  and IL-1 receptor antagonist expression in cultured human endometrial stromal cells. *J Clin Endocrinol Metab* 86,1387–1393.
- Hunt JS, Petroff MG and Burnett TG (2000) Uterine leukocytes: key players in pregnancy. *Semin Cell Dev Biol* 11,127–137.
- Irving JA and Lala PK (1995) Functional role of cell surface integrins on human trophoblast cell migration: regulation by TGF-beta, IGF-II, and IGFBP-1. *Exp Cell Res* 217,419–427.
- Jokhi PP, King A and Loke YW (1994) Production of granulocyte-macrophage colony-stimulating factor by human trophoblast cells and by decidual large granular lymphocytes. *Hum Reprod* 9,1660–1669.
- Jones RL, Kelly RW and Critchley HO (1997) Chemokine and cyclooxygenase-2 expression in human endometrium coincides with leukocyte accumulation. *Hum Reprod* 12,1300–1306.
- Jones RL, Salamonsen LA, Critchley HO, Rogers PA, Affandi B and Findlay JK (2000) Inhibin and activin subunits are differentially expressed in endometrial cells and leukocytes during the menstrual cycle, in early pregnancy and in women using progestin-only contraception. *Mol Hum Reprod* 6,1107–1117.
- Jones RL, Salamonsen LA and Findlay JK (2002a) Activin A promotes human endometrial stromal cell decidualization *in vitro*. *J Clin Endocrinol Metab* 87,4001–4004.
- Jones RL, Salamonsen LA and Findlay JK (2002b) Potential roles for endometrial inhibins, activins and follistatin during human embryo implantation and early pregnancy. *Trends Endocrinol Metab* 13,144–150.
- Jones RL, Salamonsen LA, Zhao YC, Ethier JF, Drummond AE and Findlay JK (2002c) Expression of activin receptors, follistatin and betaglycan by human endometrial stromal cells: consistent with a role for activins during decidualization. *Mol Hum Reprod* 8,363–374.
- Jones RL, Hannan NJ, Kaitu'u TJ, Zhang J and Salamonsen LA (2004) Identification of chemokines important for leukocyte recruitment to the human endometrium at the times of embryo implantation and menstruation. *J Clin Endocrinol Metab* 89,6155–6167.
- Kao LC, Tulac S, Lobo S, Imani B, Yang JP, Germeyer A, Osteen K, Taylor RN, Lessey BA and Giudice LC (2002) Global gene profiling in human endometrium during the window of implantation. *Endocrinology* 143,2119–2138.
- Kang J and Der SD (2004) Cytokine functions in the formative stages of a lymphocyte's life. *Curr Opin Immunol* 16,180–190.
- Karagouni EE, Chrysikopoulos A, Mantzavinos T, Kanakas N and Dotsika EN (1998) Interleukin-1beta and interleukin-1alpha may affect the implantation rate of patients undergoing *in vitro* fertilization-embryo transfer. *Fertil Steril* 70,553–559.
- Kariya M, Kanzaki H, Takakura K, Imai K, Okamoto N, Emi N, Kariya Y and Mori T (1991) Interleukin-1 inhibits *in vitro* decidualization of human endometrial stromal cells. *J Clin Endocrinol Metab* 73,1170–1174.
- Karmakar S and Das C (2002) Regulation of trophoblast invasion by IL-1 $\beta$  and TGF- $\beta$ 1. *Am J Reprod Immunol* 48,210–219.
- Karow J, Hudson KR, Hall MA, Vernallis AB, Taylor JA, Gossler A and Heath JK (1996) Mediation of interleukin-11-dependent biological responses by a soluble form of the interleukin-11 receptor. *Biochem J* 318,489–495.
- Karpovich N, Chobotova K, Carver J, Heath JK, Barlow DH and Mardon HJ (2003) Expression and function of interleukin-11 and its receptor alpha in the human endometrium. *Mol Hum Reprod* 9,75–80.
- Kauma S, Matt D, Strom S, Eierman D and Turner T (1990) Interleukin-1 beta, human leukocyte antigen HLA-DR alpha, and transforming growth

- factor-beta expression in endometrium, placenta, and placental membranes. *Am J Obstet Gynecol* 163,1430–1437.
- Kauma SW, Aukerman SL, Eierman D and Turner T (1991) Colony-stimulating factor-1 and c-fms expression in human endometrial and placenta during the menstrual cycle and early pregnancy. *J Clin Endocrinol Metab* 73,746–751.
- Kelly RW, King AE and Critchley HO (2001) Cytokine control in human endometrium. *Reproduction* 121,3–19.
- Kimelman D, Christian JL and Moon RT (1992) Synergistic principles of development: overlapping patterning systems in *Xenopus* mesoderm induction. *Development* 116,1–9.
- King A, Jokhi PP, Smith SK, Sharkey AM and Loke YW (1995) Screening for cytokine mRNA in human villous and extravillous trophoblasts using the reverse-transcriptase polymerase chain reaction (RT-PCR). *Cytokine* 7,364–371.
- King A, Hiby SE, Gardner L, Joseph S, Bowen JM, Verma S, Burrows TD and Loke YW (2000) Recognition of trophoblast HLA class I molecules by decidual NK cell receptors – a review. *Placenta*, 21,S81–S85.
- Kingsley DM (1994) The TGF-beta superfamily: new members, new receptors and new genetic tests of function in different organisms. *Genes Dev* 8,133–146.
- Kitaya K, Yasuda J, Yagi I, Tada Y, Fushiki S and Honjo H (2000) IL-15 expression at human endometrium and decidua. *Biol Reprod* 63,683–687.
- Kitaya K, Nakayama T, Okubo T, Kuroboshi H, Fushiki S and Honjo H (2003) Expression of macrophage inflammatory protein-1beta in human endometrium: its role in endometrial recruitment of natural killer cells. *J Clin Endocrinol Metab* 88,1809–1814.
- Kojima K, Kanzaki H, Iwai M, Hatayama H, Fujimoto J, Ioue T, Horie K, Nakayama H, Fujita J and Mori T (1994) Expression of leukemia inhibitory factor in human endometrium and placenta. *Biol Reprod* 50,882–887.
- Kojima K, Kanzaki H, Iwai M, Hatayama H, Fujimoto M, Narukawa S, Higuchi T, Kaneko Y, Mori T and Fujita J (1995) Expression of leukemia inhibitory factor receptor in human placenta: a possible role for LIF in the growth and differentiation of trophoblasts. *Mol Hum Reprod* 10,1907–1911.
- Krussel JS, Simon C, Rubio MC, Pape AR, Wen Y, Huang HY, Bielfeld P and Polan ML (1998) Expression of interleukin-1 system mRNA in single blastomeres from human preimplantation embryos. *Hum Reprod* 13,2206–2211.
- Kulkarni AB and Karlsson S (1993) Transforming growth factor-beta<sub>1</sub> knockout mice. A mutation in one cytokine gene causes a dramatic inflammatory disease. *Am J Pathol* 143,3–9.
- Kunkel EJ and Butcher EC (2003) Plasma-cell homing. *Nat Rev Immunol* 3,822–829.
- Laird SM, Tuckerman EM, Dalton CF, Dunphy BC, Li TC and Zhang X (1997) The production of leukaemia inhibitory factor by human endometrium: presence in uterine flushings and production by cells in culture. *Hum Reprod* 12,569–574.
- Layton MJ, Cross BA, Metcalf D, Ward LD, Simpson RJ and Nicola NA (1992) A major binding protein for leukemia inhibitory factor in normal mouse serum: identification as a soluble form of the cellular receptor. *Proc Natl Acad Sci USA* 89,8616–8620.
- Ledee-Bataille N, Lapree-Delage G, Taupin JL, Dubanchet S, Frydman R and Chaouat G (2002) Concentration of leukaemia inhibitory factor (LIF) in uterine flushing fluid is highly predictive of embryo implantation. *Hum Reprod* 17,213–218.
- Lessey BA, Gui Y, Apparao KB, Young SL and Mulholland J (2002) Regulated expression of heparin-binding EGF-like growth factor (HB-EGF) in the human endometrium: a potential paracrine role during implantation. *Mol Reprod Dev* 62,446–455.
- Letterio JJ and Roberts AB (1997) TGF-beta: a critical modulator of immune cell function. *Clin Immunol Immunopathol* 84,244–250.
- Leung PHY, Salamonsen LA and Findlay JK (1998) Immunolocalisation of inhibin and activin subunits in human endometrium across the menstrual cycle. *Hum Reprod* 13,3469–3477.
- Lewis MP, Clements M, Takeda S, Kirby PL, Seki H, Lonsdale LB, Sullivan MHF, Elder MG and White JO (1996) Partial characterisation of an immortalised trophoblast cell-line. *Placenta* 17,137–146.
- Li RH and Zhuang LZ (1997) The effects of growth factors on human normal placental cytotrophoblast cell proliferation. *Hum Reprod* 12,830–834.
- Librach CL, Feigenbaum SL, Bass KE, Cui T-Y, Verastan N, Sadovsky Y, Quigley JP, French DL and Fisher SJ (1994) Interleukin-1beta regulates human cytotrophoblast metalloproteinase activity and invasion in vitro. *J Biol Chem*, 269,17125–17131.
- Lin Z, Kubota T, Masuda M and Aso T (1998) Role of nitric oxide synthase in release of endothelin from cultured human endometrial cells. *Eur J Endocrinol* 138,467–471.
- Lopez-Casillas F, Cheifetz S, Doody J, Andres JL, Lane WS and Massague J (1991) Structure and expression of the membrane proteoglycan betaglycan, a component of the TGF-beta receptor system. *Cell* 67,785–795.
- Luo S, Yu H, Wu D and Peng C (2002) Transforming growth factor-beta1 inhibits steroidogenesis in human trophoblast cells. *Mol Hum Reprod* 8,318–325.
- Luster AD (1998) Chemokines – chemotactic cytokines that mediate inflammation. *N Engl J Med* 338,436–445.
- Margni RA and Zenclussen AC (2001) During pregnancy, in the context of a Th2-type cytokine profile, serum IL-6 levels might condition the quality of the synthesized antibodies. *Am J Reprod Immunol* 46,181–187.
- Marjono B, Manuelpillai U, Dimitriadis E, Salamonsen L, Breit S and Wallace E (2004) Macrophage inhibitory cytokine-1 at the maternal–fetal interface in early human pregnancy. *Reprod Fert Dev* 16,270.
- Massague J and Chen YG (2000) Controlling TGF-beta signaling. *Genes Dev* 14,627–644.
- Mather JP, Woodruff TK and Krummen LA (1992) Paracrine regulation of reproductive function by inhibin and activin. *Proc Soc Exp Biol Med* 201,1–15.
- Matzuk MM, Kumar TR, Vassalli A, Bickenbach JR, Roop DR, Jaenisch R and Bradley A (1995) Functional analysis of activins during mammalian development. *Nature* 374,354–356.
- Mazella J, Tang M and Tseng L (2004) Disparate effects of relaxin and TGFbeta1: relaxin increases, but TGFbeta1 inhibits, the relaxin receptor and the production of IGFBP-1 in human endometrial stromal/decidual cells. *Hum Reprod* 19,1513–1518.
- Messegue M, Aplin JD, Caballero-Campo P, O'Connor JE, Martin JC, Remohi J, Pellicer A and Simon C (2001) Human endometrial mucin MUC1 is up-regulated by progesterone and down-regulated in vitro by the human blastocyst. *Biol Reprod* 64,590–601.
- Metcalf D (1989) The molecular control of cell division, differentiation commitment and maturation in haemopoietic cells. *Nature* 339,27–30.
- Metcalf D (1992) Leukemia inhibitory factor- a puzzling polyfunctional regulator. *Growth Factors* 7,169–173.
- Mitchell EJ, Lee K and O'Connor-McCourt MD (1992) Characterization of transforming growth factor-beta (TGF-beta) receptors on BeWo choriocarcinoma cells including the identification of a novel 38-kDa TGF-beta binding glycoprotein. *Mol Biol Cell* 3,1295–1307.
- Moffett-King A (2002) Natural killer cells and pregnancy. *Nat Rev Immunol* 2,656–663.
- Moffett-King A, Entrican G, Ellis S, Hutchinson J and Bainbridge D (2002) Natural killer cells and reproduction. *Trends Immunol* 23,332–333.
- Montes MJ, Tortosa CG, Borja C, Abadia AC, Gonzalez-Gomez F, Ruiz C and Olivares EG (1995) Constitutive secretion of interleukin-6 by human decidual stromal cells in culture. Regulatory effect of progesterone. *Am J Reprod Immunol* 34,188–194.
- Moore AG, Brown DA, Fairlie WD, Bauskin AR, Brown PK, Munier ML, Russell PK, Salamonsen LA, Wallace EM and Breit SN (2000) The transforming growth factor-ss superfamily cytokine macrophage inhibitory cytokine-1 is present in high concentrations in the serum of pregnant women. *J Clin Endocrinol Metab* 85,4781–4788.
- Morrish DW, Bhardwaj D and Paras MT (1991) Transforming growth factor beta 1 inhibits placental differentiation and human chorionic gonadotropin and human placental lactogen secretion. *Endocrinology* 129,22–26.
- Mulayim N, Palter SF, Kayisli UA, Senturk L and Arici A (2003) Chemokine receptor expression in human endometrium. *Biol Reprod* 68,1491–1495.
- Munz B, Hubner G, Tretter Y, Alzheimer C and Werner S (1999) A novel role of activin in inflammation and repair. *J Endocrinol* 161,187–193.
- Murphy PM, Baggiolini M, Charo IF, Hebert CA, Horuk R, Matsushima K, Miller LH, Oppenheim JJ and Power CA (2000) International union of pharmacology. XXII. Nomenclature for chemokine receptors. *Pharmacol Rev* 52,145–176.
- Nachtigall MJ, Kliman HJ, Feinberg RF, Olive DL, Engin O and Arici A (1996) The effect of leukemia inhibitory factor (LIF) on trophoblast differentiation: a potential role in human implantation. *J Clin Endocrinol Metab* 81,801–806.
- Nakajima S, Tanaka T, Umesaki N and Ishiko O (2003) Leukemia inhibitory factor regulates cell survival of normal human endometrial stromal cells. *Int J Mol Med* 11,353–356.
- Neddermann P, Gallinari P, Lettieri T, Schmid D, Truong O, Hsuan JJ, Wiebauer K and Jiricny J (1996) Cloning and expression of human G/T mismatch-specific thymine-DNA glycosylase. *J Biol Chem* 271,12767–12774.
- Nishihara T, Okahashi N and Ueda N (1993) Activin A induces apoptotic cell death. *Biochem Biophys Res Commun* 197,985–991.



- Nishino E, Matsuzaki N, Masuhiro K, Kameda T, Taniguchi T, Takagi T, Saji F and Tanizawa O (1990) Trophoblast-derived interleukin-6 (IL-6) regulates human chorionic gonadotropin release through IL-6 receptor on human trophoblasts. *J Clin Endocrinol Metab* 71,436–441.
- Novick D, Engelmann H, Wallach D and Rubinstein M (1989) Soluble cytokine receptors are present in normal human urine. *J Exp Med* 170,1409–1414.
- Okada H, Nakajima T, Sanezumi M, Ikuta A, Yasuda K and Kanzaki H (2000a) Progesterone enhances interleukin-15 production in human endometrial stromal cells in vitro. *J Clin Endocrinol Metab* 85,4765–4770.
- Okada S, Okada H, Sanezumi M, Nakajima T, Yasuda K and Kanzaki H (2000b) Expression of interleukin-15 in human endometrium and decidua. *Mol Hum Reprod* 6,75–80.
- Okada H, Nakajima T, Yasuda K and Kanzaki H (2004) Interleukin-1 inhibits interleukin-15 production by progesterone during in vitro decidualization in human. *J Reprod Immunol*, 61,3–12.
- Otani T, Minami S, Kokawa K, Shikone T, Yamoto M and Nakano R (1998) Immunohistochemical localization of activin A in human endometrial tissues during the menstrual cycle and in early pregnancy. *Obstet Gynecol* 91,685–692.
- Overall CM, McQuibban GA and Clark-Lewis I (2002) Discovery of chemokine substrates for matrix metalloproteinases by exosite scanning: a new tool for degradomics. *Biol Chem* 383,1059–1066.
- Ozenci CC, Korgun ET and Demir R (2001) Immunohistochemical detection of CD45+, CD56+, and CD14+ cells in human decidua during early pregnancy. *Early Pregnancy* 5,164–175.
- Papadakis KA, Prehn J, Nelson V, Cheng L, Binder SW, Ponath PD, Andrew DP and Targan SR (2000) The role of thymus-expressed chemokine and its receptor CCR9 on lymphocytes in the regional specialization of the mucosal immune system. *J Immunol* 165,5069–5076.
- Paria BC, Ma W, Tan J, Raja S, Das SK, Dey SK and Hogan BL (2001) Cellular and molecular responses of the uterus to embryo implantation can be elicited by locally applied growth factors. *Proc Natl Acad Sci USA* 98,1047–1052.
- Petraglia F, Calza L, Garuti GC, Abrate M, Giardino L, Genazzani AR, Vale W and Meunier H (1990) Presence and synthesis of inhibin subunits in human decidua. *J Clin Endocrinol Metab* 71,487–492.
- Petraglia F, Anceschi MM, Calza L, Garuti GC, Fusaro P, Giardino L, Genazzani AR and Vale W (1993) Inhibin and activin in human fetal membranes: evidence for a local effect on prostaglandin release. *J Clin Endocrinol Metab* 77,542–548.
- Petraglia F, Florio P, Luisi S, Gallo R, Gadducci A, Viganò P, Di Blasio AM, Genazzani AR and Vale W (1998) Expression and secretion of inhibin and activin in normal and neoplastic uterine tissues. High levels of serum activin A in women with endometrial and cervical cancer. *J Clin Endocrinol Metab* 83,1194–1205.
- Petraglia F, Vaughan J and Vale W (1989) Inhibin and activin modulate the release of gonadotropin-releasing hormone, human chorionic gonadotropin, and progesterone from cultured human placental cells. *Proc Natl Acad Sci USA* 86,5114–5117.
- Piccinni MP, Beloni L, Livi C, Maggi E, Scarselli G and Romagnani S (1998) Defective production of both leukemia inhibitory factor and type 2 T-helper cytokines by decidual T cells in unexplained recurrent abortions. *Nat Med* 4,1020–1024.
- Piek E, Heldin CH and Ten Dijke P (1999) Specificity, diversity, and regulation in TGF-beta superfamily signaling. *FASEB J* 13,2105–2124.
- Polentarutti N, Allavena P, Bianchi G, Giardina G, Basile A, Sozzani S, Mantovani A and Introna M (1997) IL-2-regulated expression of the monocyte chemotactic protein-receptor (CCR2) in human NK cells: characterization of a predominant 3.4-kilobase transcript containing CCR2B and CCR2A sequences. *J Immunol* 158,2689–2694.
- Pollard JW (1997) Role of colony-stimulating factor-1 in reproduction and development. *Mol Reprod Dev* 46,54–61.
- Pollard JW, Hunt JS, Wiktor-Jedrzejczak W and Stanley ER (1991) A pregnancy defect in the osteopetrotic (op/op) mouse demonstrates the requirement for CSF-1 in female infertility. *Dev Biol* 148,273–283.
- Popovici RM, Kao LC and Giudice LC (2000) Discovery of new inducible genes in in vitro decidualized human endometrial stromal cells using microarray technology. *Endocrinology* 141,3510–3513.
- Power CA (2003) Knock out models to dissect chemokine receptor function in vivo. *J Immunol Methods* 273,73–82.
- Rabin RL, Alston MA, Sircus JC, Knollmann-Ritschel B, Moratz C, Ngo D and Farber JM (2003) CXCR3 is induced early on the pathway of CD4+ T cell differentiation and bridges central and peripheral functions. *J Immunol* 171,2812–2824.
- von Rango U, Alfer J, Kertschanska S, Kemp B, Muller-Newen G, Heinrich PC, Beier HM and Classen-Linke I (2004) Interleukin-11 expression: its significance in eutopic and ectopic human implantation. *Mol Hum Reprod* 10,783–792.
- Red-Horse K, Drake PM, Gunn MD and Fisher SJ (2001) Chemokine ligand and receptor expression in the pregnant uterus: reciprocal patterns in complementary cell subsets suggest functional roles. *Am J Pathol* 159,2199–2213.
- Ren SG, Melmed S and Braunstein GD (1997) Decidual leukemia inhibitory factor production and action on human chorionic gonadotropin secretion at different stages of gestation in vitro. *Early Pregnancy* 3,102–108.
- Robb L, Li R, Hartley L, Nandurkar HH, Koentgen F and Begley CG (1998) Infertility in female mice lacking the receptor for interleukin 11 is due to a defective uterine response to implantation. *Nat Med* 4,303–308.
- Roberts AW, Robb L, Rakar S, Hartley L, Cluse L, Nicola NA, Metcalf D, Hilton DJ and Alexander WS (2001) Placental defects and embryonic lethality in mice lacking suppressor of cytokine signaling 3. *Proc Natl Acad Sci USA* 98,9324–9329.
- Robertson SA (1998) Cytokines. In Knobil, E and Neill, J (eds) *Encyclopedia of Reproduction*. Academic Press, San Diego, CA, pp. 809–822.
- Robertson SA, Seamark RF, Guilbert LJ and Wegmann TG (1994) The role of cytokines in gestation. *Crit Rev Immunol* 14,239–292.
- Robertson SA, Roberts CT, Farr KL, Dunn AR and Seamark RF (1999) Fertility impairment in granulocyte-macrophage colony-stimulating factor-deficient mice. *Biol Reprod* 60,251–261.
- Robertson SA, O'Connell A and Ramsey A (2000) The effect of interleukin-6 deficiency on implantation, fetal development and parturition in mice. *Proc Aust Soc Reprod Biol* 31,97.
- Robertson MJ, Williams BT, Christopherson K, Brahmi Z and Hromas R (2000) Regulation of human natural killer cell migration and proliferation by the exodus subfamily of CC chemokines. *Cell Immunol*, 199,8–14.
- Robinson G and Hennighausen L (1997) Inhibins and activins regulate mammary epithelial cell differentiation through mesenchymal-epithelial interactions. *Development* 124,2701–2708.
- Ruiz C, Montes MJ, Abadia-Molina AC and Olivares EG (1997) Phagocytosis by fresh and cultured human decidual stromal cells: opposite effects of interleukin-1 alpha and progesterone. *J Reprod Immunol* 33,15–26.
- Salamonsen LA, Dimitriadis E and Robb L (2000) Cytokines in implantation. *Semin Reprod Med* 18,299–310.
- Salamonsen LA and Woolley DE (1999) Menstruation: induction by matrix metalloproteinases and inflammatory cells. *J Reprod Immunol* 44,1–27.
- Salamonsen LA and Nie G (2002) Proteases at the endometrial-trophoblast interface: their role in implantation. *Rev Endocr Metab Disord* 3,133–143.
- Sands BE, Bank S, Sninsky CA, Robinson M, Katz S, Singleton JW, Miner PB, Safdi MA, Galandiuk S, Hanauer SB *et al.* (1999) Preliminary evaluation of safety and activity of recombinant human interleukin 11 in patients with active Crohn's disease. *Gastroenterology* 117,58–64.
- Sato Y, Higuchi T, Yoshioka S, Tatsumi K, Fujiwara H and Fujii S (2003) Trophoblasts acquire a chemokine receptor, CCR1, as they differentiate towards invasive phenotype. *Development* 130,5519–5532.
- Sawai K, Matsuzaki N, Kameda T, Hashimoto K, Okada T, Shimoya K, Nobunaga T, Taga T, Kishimoto T and Saji F (1995a) Leukemia inhibitory factor produced at the fetomaternal interface stimulates chorionic gonadotropin production: its possible implication during pregnancy, including implantation period. *J Clin Endocrinol Metab* 80,1449–1456.
- Sawai K, Azuma C, Koyama M, Ito S, Hashimoto K, Kimura T, Samejima Y, Nobunaga T and Saji F (1995b) Leukemia inhibitory factor (LIF) enhances trophoblast differentiation mediated by human chorionic gonadotropin (hCG). *Biochem Biophys Res Commun* 211,137–143.
- Sawai K, Matsuzaki N, Okada T, Shimoya K, Koyama M, Azuma C, Saji F and Murata Y (1997) Human decidual cell biosynthesis of leukemia inhibitory factor: regulation by decidual cytokines and steroid hormones. *Biol Reprod* 56,1274–1280.
- Schofield G and Kimber SJ (2005) Leukocyte subpopulations in the uteri of leukemia inhibitory factor knockout mice during early pregnancy. *Biol Reprod* 72,872–878.
- Schonbeck U, Mach F and Libby P (1998) Generation of biologically active IL-1 beta by matrix metalloproteinases: a novel caspase-1-independent pathway of IL-1 beta processing. *J Immunol* 161,3340–3346.
- Schull MM, Ormsby I, Kler AB, Pawlowski S, Diebold RJ, Yin M, Allen R, Sidman C, Proetzel G, Galvin D *et al.* (1992) Targeted disruption of mouse transforming growth factor beta1 gene results in multifocal inflammatory disease. *Nature* 359,693–699.
- Seder RA, Grabstein KH, Berzofsky JA and McDyer JF (1995) Cytokine interactions in human immunodeficiency virus-infected individuals: roles of interleukin (IL) -2, IL-12, and IL-15. *J Exp Med* 182,1067–1077.

- Semer D, Reisler K, MacDonald PC and Casey ML (1991) Responsiveness of human endometrial stromal cells to cytokines. *Ann N Y Acad Sci* 622,99–110.
- Sharkey A (1998) Cytokines and implantation. *Rev Reprod* 3,52–61.
- Sharkey AM, Dellow K, Blayney M, Macnamee M, Charnock-Jones DS and Smith SK (1995) Stage-specific expression of cytokine and receptor messenger ribonucleic acids in human preimplantation embryos. *Biol Reprod* 53,974–981.
- Sharkey AM, King A, Clark DE, Burrows TD, Jokhi PP, Charnock-Jones DS, Loke YW and Smith SK (1999) Localization of leukemia inhibitory factor and its receptor in human placenta throughout pregnancy. *Biol Reprod* 60,355–364.
- Sherwin JR, Smith SK, Wilson A and Sharkey AM (2002) Soluble gp130 is up-regulated in the implantation window and shows altered secretion in patients with primary unexplained infertility. *J Clin Endocrinol Metab* 87,3953–3960.
- Sherwin JR, Freeman TC, Stephens RJ, Kimber S, Smith AG, Chambers I, Smith SK and Sharkey AM (2004) Identification of genes regulated by leukemia-inhibitory factor in the mouse uterus at the time of implantation. *Mol Endocrinol* 18,2185–2195.
- Sheth KV, Roca GL, al-Sedary ST, Parhar RS, Hamilton CJ and al-Abdul Jabbar F (1991) Prediction of successful embryo implantation by measuring interleukin-1 and immunosuppressive factor (s) in preimplantation embryo culture fluid. *Fertil Steril* 55,952–957.
- Shi Y and Massague J (2003) Mechanisms of TGF-beta signaling from cell membrane to the nucleus. *Cell* 113,685–700.
- Shimonaka M, Inouye S, Shimasaki S and Ling N (1991) Follistatin binds to both activin and inhibin through the common subunit. *Endocrinology* 128,3313–3315.
- Simon C, Piquette GN, Frances A and Polan ML (1993) Localization of interleukin-1 type I receptor and interleukin-1 beta in human endometrium throughout the menstrual cycle. *J Clin Endocrinol Metab* 77,549–555.
- Simon C, Frances A, Piquette G, Hendrickson M, Milki A and Polan ML (1994a) Interleukin-1 system in the materno-trophoblast unit in human implantation: immunohistochemical evidence for autocrine/paracrine function. *J Clin Endocrinol Metab* 78,847–854.
- Simon C, Frances A, Piquette GN, el Danasouri I, Zurawski G, Dang W and Polan ML (1994b) Embryonic implantation in mice is blocked by interleukin-1 receptor antagonist. *Endocrinology* 134,521–528.
- Simon C, Gimeno MJ, Mercader A, O'Connor JE, Remohi J, Polan ML and Pellicer A (1997a) Embryonic regulation of integrins beta 3, alpha 4, and alpha 1 in human endometrial epithelial cells in vitro. *J Clin Endocrinol Metab* 82,2607–2616.
- Simon C, Mercader A, Gimeno MJ and Pellicer A (1997b) The interleukin-1 system and human implantation. *Am J Reprod Immunol* 37,64–72.
- Simon C, Valbuena D, Krussel J, Bernal A, Murphy CR, Shaw T, Pellicer A and Lake Polan M (1998) Interleukin-1 receptor antagonist prevents embryonic implantation by a direct effect on the endometrial epithelium. *Fertil Steril* 70,896–906.
- Sims JE, Gayle MA, Slack JL, Alderson MR, Bird TA, Giri JG, Colotta F, Re F, Mantovani A and Shanebeck K (1993) Interleukin 1 signaling occurs exclusively via the type I receptor. *Proc Natl Acad Sci USA* 90,6155–6159.
- Sims JE, Nicklin MJ, Bazan JF, Barton JL, Busfield SJ, Ford JE, Kastelein RA, Kumar S, Lin H, Mulero JJ *et al.* (2001) A new nomenclature for IL-1-family genes. *Trends Immunol* 22,536–537.
- Singer CF, Marbaix E, Lemoine P, Courtoy PJ and Eeckhout Y (1999) Local cytokines induce differential expression of matrix metalloproteinases but not their tissue inhibitors in human endometrial fibroblasts. *Eur J Biochem* 259,40–45.
- Sinha S, Nevett C, Shuttleworth CA and Kielty CM (1998) Cellular and extracellular biology of the latent transforming growth factor-beta binding proteins. *Matrix Biol* 17,529–545.
- Sjoberg C, Roberts CT, Wikland M and Robertson SA (2005) GM-CSF alleviates adverse consequences of embryo culture on fetal growth trajectory and placental morphogenesis. *Endocrinology* (Epub ahead of print).
- Smith JC, Price BM, Van Nimmen K and Huylebroeck D (1990) Identification of a potent *Xenopus* mesoderm-inducing factor as a homologue of activin A. *Nature* 345,729–731.
- Smith AN, Carter QL, Kniss DA and Brown TL (2001) Characterization of a TGFbeta-responsive human trophoblast-derived cell line. *Placenta* 22,425–431.
- Song Y, Keelan J and France JT (1996) Activin-A stimulates, while transforming growth factor beta 1 inhibits, chorionic gonadotrophin production and aromatase activity in cultured human placental trophoblasts. *Placenta* 17,603–610.
- Spandorfer SD, Barmat LI, Liu HC, Mele C, Veeck LL and Rosenwaks Z (1998) Granulocyte macrophage-colony stimulating factor production by autologous endometrial co-culture is associated with outcome for in vitro fertilization patients with a history of multiple implantation failures. *Am J Reprod Immunol* 40,377–381.
- Stanley ER, Guilbert LJ, Tushinski RJ and Bartelmez SH (1983) CSF-1- a mononuclear phagocyte lineage-specific hemopoietic growth factor. *J Cell Biol* 21,151–159.
- Stewart CL, Kaspar P, Brunet LJ, Bhatt H, Gadi I, Kontgen F and Abbondanzo SJ (1992) Blastocyst implantation depends on maternal expression of leukemia inhibitory factor. *Nature* 359,76–79.
- Stoikos C, Dimitriadis E, Stafford-Bell MA, Kovacs G and Salamonsen LA (2003) Immunolocalisation of interleukin 11 and its receptor in endometrium of infertile women during the implantation window. *Reprod Fertil Dev* 15,31.
- Svenson M, Hansen MB, Heegaard P, Abell K and Bendtzen K (1993) Specific binding of interleukin 1 (IL-1) beta and IL-1 receptor antagonist (IL-1ra) to human serum. High-affinity binding of IL-1ra to soluble IL-1 receptor type I. *Cytokine* 5,427–435.
- Tabibzadeh S, Kong QF, Babaknia A and May LT (1995) Progressive rise in the expression of interleukin-6 in human endometrium during menstrual cycle is initiated during the implantation window. *Hum Reprod* 10,2793–2799.
- Tabibzadeh S and Sun XZ (1992) Cytokine expression in human endometrium throughout the menstrual cycle. *Hum Reprod* 7,1214–1221.
- Taga T, Hibi M, Hirata Y, Yamasaki K, Yasukawa K, Matsuda T, Hirano T and Kishimoto T (1989) Interleukin-6 triggers the association of its receptor with a possible signal transducer, gp130. *Cell* 58,573–581.
- Takahashi Y, Carpino N, Cross JC, Torres M, Parganas E and Ihle JN (2003) SOCS3: an essential regulator of LIF receptor signaling in trophoblast giant cell differentiation. *Embo J* 22,372–384.
- Takeda K, Noguchi K, Shi W, Tanaka T, Matsumoto M, Yoshida N, Kishimoto T and Akira S (1997) Targeted disruption of the mouse Stat3 gene leads to early embryonic lethality. *Proc Natl Acad Sci USA* 94,3801–3804.
- Taub DD, Sayers TJ, Carter CR and Ortaldo JR (1995) Alpha and beta chemokines induce NK cell migration and enhance KN-mediated cytotoxicity. *J Immunol* 155,3877–3888.
- Thomsen G, Woolf T, Whitman M, Sokol S, Vaughan J, Vale W and Melton DA (1990) Activins are expressed early in *Xenopus* embryogenesis and can induce axial mesoderm and anterior structures. *Cell* 63,485–493.
- Thorpe (2002) Chemokine/chemokine receptor nomenclature. IUIS/WHO subcommittee on chemokine nomenclature. *J Immunol Methods* 262,1–3.
- Tierney EP and Giudice LC (2004) Role of activin A as a mediator of in vitro endometrial stromal cell decidualization via the cyclic adenosine monophosphate pathway. *Fertil Steril* 81,899–903.
- Tierney EP, Tulac S, Huang S-TJ and Giudice LC (2003) Activation of the protein kinase A pathway in human endometrial stromal cells reveals sequential categorical gene regulation. *Physiol Genomics* 16,47–66.
- Tomida M, Yamamoto-Yamaguchi Y and Hozumi M (1984) Purification of a factor inducing differentiation of mouse myeloid leukaemic M1 cells from conditional medium of mouse fibroblast L929 cells. *J Biol Chem* 259,10978–10982.
- Tremellen KP, Seamark RF and Robertson SA (1998) Seminal transforming growth factor beta1 stimulates granulocyte-macrophage colony-stimulating factor production and inflammatory cell recruitment in the murine uterus. *Biol Reprod* 58,1217–1225.
- Trundley A and Moffett A (2004) Human uterine leukocytes and pregnancy. *Tissue Antigens* 63,1–12.
- Tsai HD, Chang CC, Hsieh YY and Lo HY (2000) Leukemia inhibitory factor expression in different endometrial locations between fertile and infertile women throughout different menstrual phases. *J Assist Reprod Genet* 17,415–418.
- Underhill-Day N, McGovern LA, Karpovich N, Mardon HJ, Barton VA and Heath JK (2003) Functional characterization of W147A: a high-affinity interleukin-11 antagonist. *Endocrinology* 144,3406–3414.
- Vaday GG, Franitza S, Schor H, Hecht I, Brill A, Cahalon L, Hershkovitz R and Lider O (2001) Combinatorial signals by inflammatory cytokines and chemokines mediate leukocyte interactions with extracellular matrix. *J Leukoc Biol* 69,885–892.
- Van Damme J, Struyf S and Opdenakker G (2004) Chemokine-protease interactions in cancer. *Semin Cancer Biol* 14,201–208.

- Van den Steen PE, Husson SJ, Proost P, Van Damme J and Opdenakker G (2003a) Carboxyterminal cleavage of the chemokines MIG and IP-10 by gelatinase B and neutrophil collagenase. *Biochem Biophys Res Commun* 310,889–896.
- Van den Steen PE, Wuyts A, Husson SJ, Proost P, Van Damme J and Opdenakker G (2003b) Gelatinase B/MMP-9 and neutrophil collagenase/MMP-8 process the chemokines human GCP-2/CXCL6, ENA-78/CXCL5 and mouse GCP-2/LIX and modulate their physiological activities. *Eur J Biochem* 270,3739–3749.
- Vandermolen DT and Gu Y (1996) Human endometrial interleukin-6 (IL-6): in vivo messenger ribonucleic acid expression, in vitro protein production, and stimulation thereof by IL-1 beta. *Fertil Steril* 66,741–747.
- Verma S, Hiby SE, Loke YW and King A (2000) Human decidual natural killer cells express the receptor for and respond to the cytokine interleukin 15. *Biol Reprod* 62,959–968.
- Vicovac LM, Starkey PM and Aplin JD (1994) Comment: effect of cytokines on prolactin production by human decidual stromal cells in culture: studies using cells freed of bone marrow-derived contaminants. *J Clin Endocrinol Metab* 79,1877–1882.
- Vitale S, Schmid-Alliana A, Breuil V, Pomeranz M, Millet MA, Rossi B and Schmid-Antomarchi H (2004) Soluble fractalkine prevents monocyte chemoattractant protein-1-induced monocyte migration via inhibition of stress-activated protein kinase 2/p38 and matrix metalloproteinase activities. *J Immunol*,172,585–592.
- Vogiagis D, Marsh MM, Fry RC and Salamonsen LA (1996) Leukemia inhibitory factor in human endometrium throughout the menstrual cycle. *J Endocrinol* 148,95–102.
- Vuckovic M, Genbacev O and Kumar S (1992) Immunohistochemical localization of transforming growth factor-beta in first and third trimester human placenta. *Pathobiology* 60,149–151.
- Wang X, Athayde N and Trudinger B (2003) A proinflammatory cytokine response is present in the fetal placental vasculature in placental insufficiency. *Am J Obstet Gynecol* 189,1445–1451.
- Ward LD, Howlett GJ, Hammacher A, Weinstock J, Yasukawa K, Simpson RJ and Winzor DJ (1995) Use of a biosensor with surface plasmon resonance detection for the determination of binding constants: measurement of interleukin-6 binding to the soluble interleukin-6 receptor. *Biochemistry* 34,2901–2907.
- Ward SG, Bacon K and Westwick J (1998) Chemokines and T lymphocytes: more than an attraction. *Immunity* 9,1–11.
- Ware CB, Horowitz MC, Renshaw BR, Hunt JS, Liggitt D, Koblar SA, Gliniak BC, McKenna HJ, Papayannopoulou T, Thoma B *et al.* (1995) Targeted disruption of the low-affinity leukemia inhibitory factor receptor gene causes placental, skeletal, neural and metabolic defects and results in perinatal death. *Development* 121,1283–1299.
- White CA, Dimitriadis E, Sharkey A, Stoikos CJ and Salamonsen LA (2004) Interleukin-11 enhances endometrial stromal cell decidualization via activation and inhibition of target genes. *Reprod Fertil Dev* 16,91.
- Wooding FBP and Flint APF (1994) Placentation. In Lamming, GE (ed.) *Marshall's Physiology of Reproduction*. Chapman & Hall, London, pp. 235–460.
- Yagel S, Lala PK, Powell WA and Casper RF (1989) Interleukin-1 stimulates human chorionic gonadotropin secretion by first trimester human trophoblast. *J Clin Endocrinol Metab* 68,992–995.
- Yamashita H, Ten Dijke P, Huylebroeck D, Sampath TK, Andries M, Smith JC, Heldin CH and Miyazono K (1995) Osteogenic protein-1 binds to activin type II receptors and induces certain activin-like effects. *J Cell Biol* 130,217–226.
- Yi SE, LaPolt PS, Yoon BS, Chen JY, Lu JK and Lyons KM (2001) The type I BMP receptor Bmpr1B is essential for female reproductive function. *Proc Natl Acad Sci USA* 98,7994–7999.
- Ying SY, Zhang Z, Furst B, Batres Y, Huang G and Li G (1997) Activins and activin receptors in cell growth. *Proc Soc Exp Biol Med* 214,114–122.
- Ying Y and Zhao GQ (2000) Detection of multiple bone morphogenetic protein messenger ribonucleic acids and their signal transducer, Smad1, during mouse decidualization. *Biol Reprod* 63,1781–1786.
- Yoshida K, Taga T, Saito M, Suematsu S, Kumanogoh A, Tanaka T, Fujiwara H, Hirata M, Yamagami T, Nakahata T *et al.* (1996) Targeted disruption of gp130, a common signal transducer for the interleukin 6 family of cytokines, leads to myocardial and haematological disorders. *Proc Natl Acad Sci USA* 93,407–411.
- Yoshino O, Osuga Y, Hirota Y, Koga K, Hirata T, Yano T, Ayabe T, Tsutsumi O and Taketani Y (2003) Endometrial stromal cells undergoing decidualization down-regulate their properties to produce proinflammatory cytokines in response to interleukin-1 beta via reduced p38 mitogen-activated protein kinase phosphorylation. *J Clin Endocrinol Metab* 88,2236–2241.
- Yu J and Dolter KE (1997) Production of activin A and its roles in inflammation and hematopoiesis. *Cytokines Cell Mol Ther* 3,169–177.
- Zencussen AC, Blois S, Stumpo R, Olmos S, Arias K, Malan Borel I, Roux ME and Margni RA (2003) Murine abortion is associated with enhanced interleukin-6 levels at the feto-maternal interface. *Cytokine* 24,150–160.
- Zhang J, Lathbury LJ and Salamonsen LA (2000) Expression of the chemokine eotaxin and its receptor CCR3 in human endometrium. *Biol Reprod* 62,404–411.
- Zhao Y and Chegini N (1999) The expression of granulocyte macrophage-colony stimulating factor (GM-CSF) and receptors in human endometrium. *Am J Reprod Immunol* 42,303–311.
- Zlotnik A and Yoshie O (2000) Chemokines: a new classification system and their role in immunity. *Immunity* 12,121–127.
- Zolti M, Ben-Rafael Z, Meirum R, Shemesh M, Bider D, Mashiach S and Apte RN (1991) Cytokine involvement in oocytes and early embryos. *Fertil Steril* 56,265–272.
- Zourbas S, Dubanchet S, Martal J and Chaouat G (2001) Localization of pro-inflammatory (IL-12, IL-15) and anti-inflammatory (IL-11, IL-13) cytokines at the foetomaternal interface during murine pregnancy. *Clin Exp Immunol* 126,519–528.

Submitted on March 7, 2005; revised on May 10, 2005; accepted on May 20, 2005
